RESEARCH ARTICLE

# The Relationships between physical activity, sedentary behaviour, sleep, and dementia: A systematic review and meta-analysis of cohort studies

Akinkunle Oye-Somefun <sup>\*</sup>, Parmis Mirzadeh, Jenny Gao-Kang, Michael Rotondi, Jennifer L. Kuk , Hala Tamim, Chris I. Ardern

York University, Toronto, Ontario, Canada

\* [akinkunle.oye-somefun@sri.utoronto.ca](mailto:akinkunle.oye-somefun@sri.utoronto.ca)

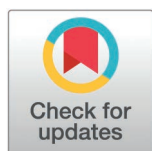

 OPEN ACCESS

**Citation:** Oye-Somefun A, Mirzadeh P, Gao-Kang J, Rotondi M, Kuk JL, Tamim H, et al. (2026) The Relationships between physical activity, sedentary behaviour, sleep, and dementia: A systematic review and meta-analysis of cohort studies. *PLoS One* 21(4): e0343621. <https://doi.org/10.1371/journal.pone.0343621>

**Editor:** Simone A Tomaz, University of Stirling, UNITED KINGDOM OF GREAT BRITAIN AND NORTHERN IRELAND

**Received:** November 10, 2025

**Accepted:** February 9, 2026

**Published:** April 8, 2026

**Copyright:** © 2026 Oye-Somefun et al. This is an open access article distributed under the terms of the [Creative Commons Attribution License](https://creativecommons.org/licenses/by/4.0/), which permits unrestricted use, distribution, and reproduction in any medium, provided the original author and source are credited.

**Data availability statement:** All relevant data are within the paper and its [Supporting Information](#) files.

## Abstract

### Objective

This study aimed to summarize the observational evidence from prospective cohort studies examining the associations of regular physical activity, sedentary behaviour, and sleep duration with incident dementia among community-dwelling adults aged 35 years and older.

### Methods

Systematic literature searches (1946 to August 2025) of CINAHL, EMBASE, MEDLINE, PSYCINFO, and SPORTDISCUS were performed. Eligible studies included community-dwelling adults aged 35+ years with at least one year of follow-up and valid measures of movement behaviours and dementia outcomes. Studies were excluded if they included participants with baseline dementia, lacked risk estimates for all-cause dementia. Grey literature was excluded. Random effects meta-analysis generated pooled risk ratio (RR) and 95% confidence intervals (CI). Primary exposures were defined using national thresholds for physical activity, sedentary time, and sleep duration. Subgroup analyses were performed by age and follow-up duration.

### Results

Forty-nine studies with physical activity (n=2,855,529), 17 studies on sleep duration (n=1,344,170), and three studies on sedentary duration (n=295,809) were included. Regular physical activity significantly reduced the risk of incident dementia (pooled RR=0.75, 95% CI=0.68 to 0.82), though heterogeneity was substantial and partially explained by subgroup analyses. Prolonged sedentary behaviour (8+ hours/day sitting) increased dementia risk (RR=1.27, 95% CI=1.17 to 1.39) with low heterogeneity. Moreover, both short (<7 hours; RR=1.18, 95% CI=1.09 to 1.28) and long

**Funding:** The author(s) received no specific funding for this work.

**Competing interests:** The authors have declared that no competing interests exist.

(>8 hours; RR = 1.28, 95% CI = 1.15 to 1.43) sleep were linked to higher dementia risk compared with 7–8 hours. Heterogeneity was moderate to substantial.

## Conclusion

Regular physical activity, less sedentary time and appropriate nightly sleep (7–8 h) may be associated with reduced risk of dementia and are potentially modifiable factors in the prevention or delay of dementia. Future studies with middle-aged adults and longer-term follow-up including changes in movement behaviours over time are needed to better understand the relationship between physical activity, sedentary behaviour, and sleep for dementia risk.

## PROSPERO Registration

CRD42021272054.

## Introduction

Dementia refers to a group of neurodegenerative disorders characterized by cognitive decline and memory loss, and it is a leading cause of death in older adults [1]. Among these disorders, Alzheimer's disease (AD) is the most common form, accounting for approximately 60–80% of all cases of dementia, with about 10 million new diagnoses of AD each year [2]. Currently, an estimated 55 million people worldwide are living with dementia [3]. This number is projected to triple by 2050, with approximately 60% of cases (dementia) occurring in low- and middle-income countries [4]. In 2018, the global cost of dementia care (direct and indirect expenses) was estimated at \$1 trillion, and this figure is expected to double by 2030 [4–5].

Dementia results in severe worsening of cognitive function, disability, dependency, quality of life, and risk of death in individuals aged 65 years and over [6]. The pre-clinical or prodromal period of dementia may occur decades before symptoms [7–8], and available pharmacological interventions have provided only limited success at preventing or treating dementia [9], despite the use of a wide range of medications with adverse side effects [10]. Research on modifiable risk factors, including physical activity (PA), is important for informing evidence-based prevention strategies [11–13]. Older adults transitioning to retirement have low levels of regular physical activity [14], making this a period for accelerated health decline. Healthy movement behaviours, such as regular physical activity, limiting sedentary time, and appropriate nightly sleep, may be important for the management of dementia risk factors.

Physical activity has been linked with cognitive performance [15]; however, the relationship with dementia is less clear [16]. Epidemiological studies have shown that regular movement behaviours could lower the risk of cardiovascular disease including chronic inflammation [17–19] and are effective at lowering the risk of dementia and cognitive decline in older adult populations [20]. Sedentary behaviour is also a risk factor for cardiovascular disease. Prolonged sitting has been linked to a wide range of problems including insulin resistance, inflammation, oxidative stress, which

present an increased risk of neurodegenerative disease [21]. Prolonged sedentary time may contribute to poor cognitive functioning and increased risk of cardiovascular disease [21–24]. Finally, sleep problems have also been associated with an increased risk of death [25], and dementia [26–27]; however, the effects of sleep duration and long-term sleep problems on the risk of dementia are not well known [28–29]. Because movement behaviours are independently related to cardiovascular health [21,30], it is important to understand how these movement behaviours work together to maintain brain health [31].

The risk of developing dementia tends to accelerate in older age [32], and it has been reported that the management of risk factors through lifestyle intervention could delay or prevent up to 45% of cases of dementia worldwide [33]. The 2024 Lancet Commission update highlights midlife physical inactivity as a modifiable risk factor, accounting for approximately 2% of new dementia cases, underscoring the importance of movement behaviours earlier in adulthood [33].

Understanding the relationship between movements behaviours and dementia risk at an earlier age is needed to help inform risk reduction strategies in susceptible middle-aged and older-aged adult populations. Community-dwelling adults represent the primary target population for preventive strategies, as lifestyle behaviours are largely self-directed and modifiable prior to the onset of severe cognitive impairment. Moreover, few systematic reviews and meta-analyses have examined these relationships in community-dwelling adult populations across diverse ages [34–35] and follow-up durations [36–37]. From this framework, we evaluated the relationships between established or recommended physical activity levels, sedentary behaviour, and sleep duration with incident dementia in community-dwelling adults, using a systematic review and meta-analysis of observational, prospective cohort studies.

## Methods

This systematic review and meta-analysis (SRMA) was registered in PROSPERO CRD42021272054. Systematic literature searches were conducted from the earliest available date in each database through August 2025 (MEDLINE 1946, EMBASE 1974, APA PsycInfo 1967, CINAHL 1994, SPORTDiscus 1992) using the standard online interfaces of each database without specialized search software or language restrictions, to identify relevant peer-reviewed journal articles related to reports of movement behaviours with dementia in community-dwelling adult populations. Search terms included (but were not limited to) the following: physical activity, walking, sedentary behaviour, sleep, memory, cognition, dementia, alone or combined using Boolean operators in each database (see [S1 Table](#) for the full electronic MEDLINE search strategy). Grey literature was not considered. Duplicate records were manually identified and removed during screening. References of retrieved articles were examined to locate additional relevant articles, and published studies were screened by title and abstract. Two independent reviewers (JGK and PM) screened studies by title and abstract and evaluated full-text articles for eligibility and study quality. Duplicate records were manually identified and removed during the screening process. Where necessary, consensus with a third reviewer (CIA) was used to resolve discrepancies. Risk of bias was evaluated using the risk of bias in non-randomized studies of interventions (ROBINS-I tool) [38]; the assessment was performed by a single reviewer (PM). To mitigate potential biases and enhance the reliability of the evaluation, the assessments were validated by a second reviewer (CIA).

Studies with appropriate definitions of incident dementia were included if their longitudinal cohort study designs involved measuring the outcome at follow-up. Longitudinal designs were defined a priori as those establishing temporal ordering between baseline exposure assessment and subsequent incident dementia, thereby minimizing reverse causation. Studies were eligible for inclusion if they: i) used a longitudinal cohort design; ii) included healthy, community-dwelling adults aged  $\geq 35$  years at baseline; and iii) assessed incident (new-onset) all-cause dementia during follow-up. Studies were excluded if they: i) lacked a valid measure of a primary exposure or outcome of interest; ii) had a follow-up period of less than 1 year; iii) included participants with a clinical diagnosis of dementia at baseline; iv) did not report a risk estimate for all-cause dementia at follow-up; or v) represented duplicate analyses of the same cohort participants as other included studies. In these instances, studies with larger samples over subsets, higher quality and more interpretable

measures of physical activity levels, and longer follow-up times were prioritized to enhance generalizability. Analysis of data and presentation of results were based on the preferred reporting items for systematic reviews and meta-analyses (PRISMA) guidelines [39]. Ethics approval was not required from our host institution as there was no potential for participant identification from published summary data.

### Risk of bias assessment

We assessed risk of bias, and representativeness of the current evidence. A comprehensive score of bias was assigned by aggregating sources of bias using the Risk of Bias in Non-randomised Studies – of Interventions or “ROBINS-I Assessment Tool” for observational study designs [38,40]. Evaluation of study bias was done across seven domains, including: risk of bias due to confounding, participant recruitment and selection, classification to (or deviation from) assigned interventions, missing data, measurement, and selection of the reported result. Overall bias was subsequently classified as “Low”, “Moderate”, or “Serious” as per the open-source ROBINS-I risk aggregation tool (.xls) developed by Marcolino (2020).

### Outcome

The primary study endpoint was incident all-cause dementia according to neuropsychiatric evaluations, health registry data, and standardized clinical diagnostic criteria. We included studies where dementia was ascertained with or without dementia as the cause of death. Relevant data were extracted from individual studies including the most saturated (i.e., fully adjusted) primary outcome estimate (odds ratio (OR), risk ratio (RR), and hazard ratio (HR)) along with their 95% confidence intervals (CI) using a pre-specified format.

### Exposures

The primary study exposures were based on self-report questionnaire and operationalized to approximate established movement behaviour thresholds used by national agencies [41]. For physical activity, the “active” group was defined as participating in 150 minutes or more per week of aerobic activity and compared to the “inactive” group (or approximations thereof in comparing the highest vs lowest active groups in a distribution) [41]. For sedentary time, the optimal time spent sitting per day was defined as engaging in fewer than 8 hours of sitting, compared to prolonged sitting (8+ hours) [41]. For nightly sleep duration, shorter (<7 hours) and longer (>8 hours) sleep categories were compared to 7–8 hours of sleep per night [41].

### Statistical analyses

For each of our primary outcomes (PA, sedentary time and sleep), the primary statistical analyses pool effect measures from each individual study and their respective estimate of variance in a meta-analytic framework. We combined results of longitudinal cohort studies, including risk estimates that were adjusted for multiple confounding factors. Studies were assumed to be heterogeneous and random effects models were used to calculate pooled estimates (OR/RR/HR) under the rare disease assumption [42]. Risk estimates were log transformed for analysis purposes. The  $I^2$  statistic was used to assess the heterogeneity between studies [42]. Subgroup analyses were performed by age and follow-up duration. Forest plots were generated to illustrate the results of the random-effects meta-analysis, displaying both 95% CI and 95% prediction intervals (PI). A result was considered statistically significant when the 95% CI did not include 1 (null). In contrast, a 95% PI crossing 1 indicates potential between-study variability in future studies. Funnel plots were used to assess potential bias due to missing results (publication bias) for the overall analyses. The analysis was performed using R (version 4.1.3) [43] and the **metafor** package (version 3.4.0) [44] with a two-sided type 1 error rate of 5%.

## Results

The PRISMA flow diagram (see Fig 1) summarizes the studies selected for inclusion in this report consistent with the PRISMA statement [39]. Descriptive characteristics of each of the included studies are reported (see S2–S4 Tables). Reporting of variability (e.g., standard deviations) was inconsistent across studies and therefore is not shown.

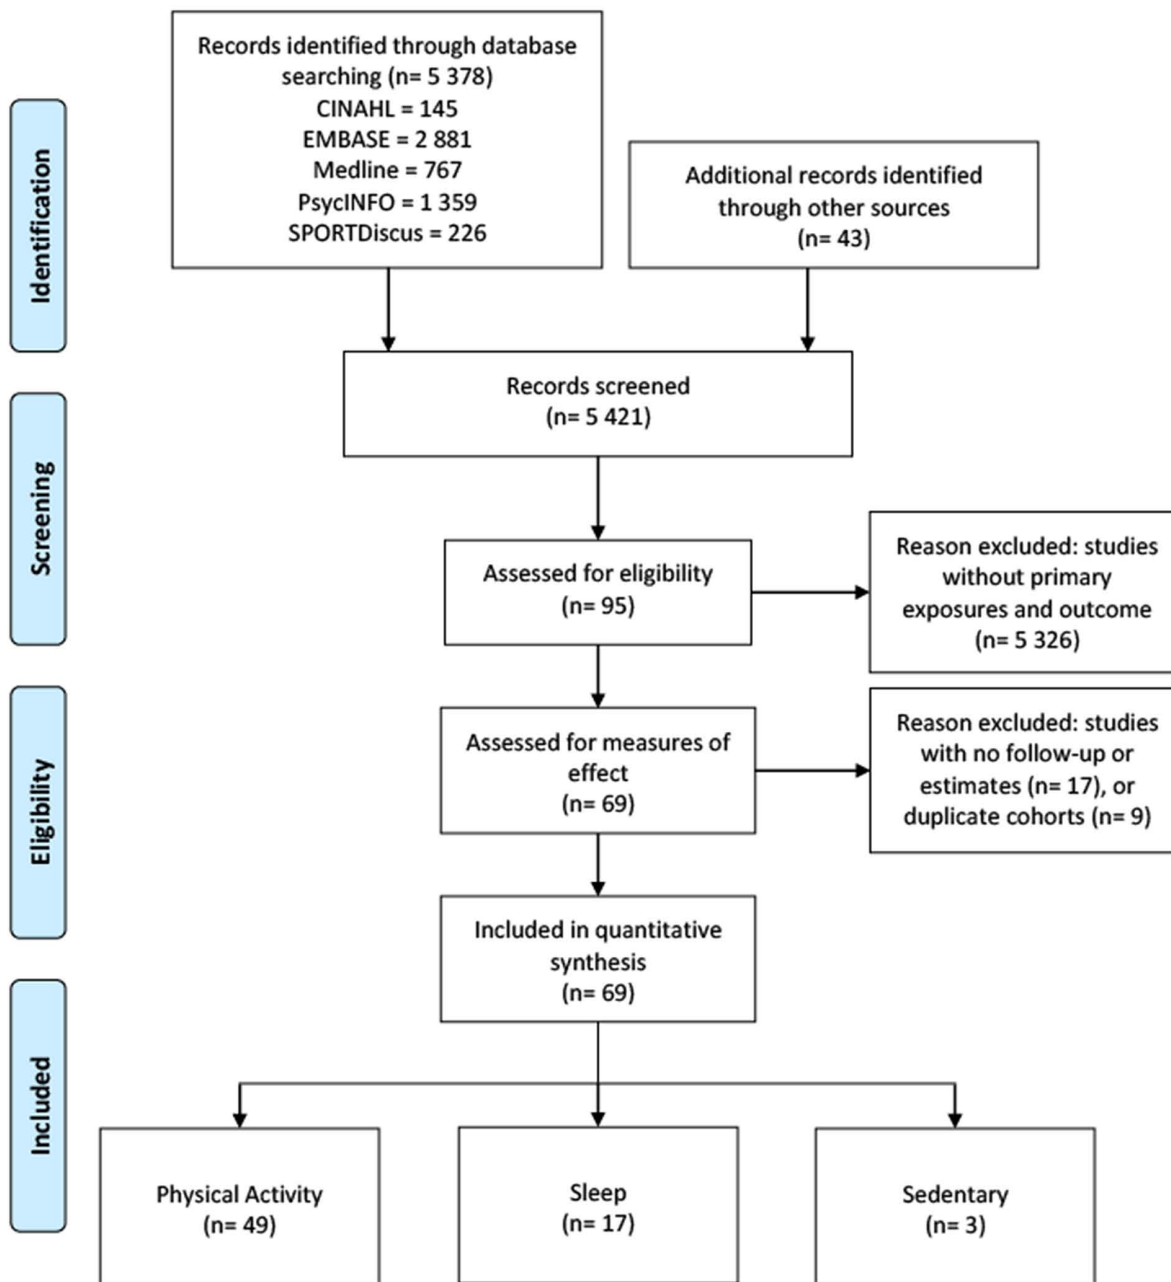

Fig 1. PRISMA flow diagram. Illustrates the study selection process..

<https://doi.org/10.1371/journal.pone.0343621.g001>

## Quantitative synthesis

Forest plots of the pooled estimates for analysis are included by movement behaviour type: physical activity (see Fig 2), sleep (see Fig 3 and 4), and sedentary time (see Fig 5). Funnel plots of the included studies are included by movement behaviour type: physical activity (see S5 Fig), sleep (see S6 and S7 Fig), and sedentary time (see S8 Fig).

### Physical activity

A total of 49 articles met the inclusion criteria for quantitative synthesis as it relates to physical activity [45–93]. Collectively, these studies included 2,855,529 participants, of whom 97,167 (3.4%) were diagnosed with dementia during follow-up. The mean age across studies was 67.3 years, and the mean follow-up duration was 11.6 years. Overall, 25 of the 49 studies (51.0%) included in the meta-analysis reported a statistically significant reduction in risk of dementia in the physically active middle-age and older adults. The overall ( $k=49$ ) random effects log risk ratio was calculated as  $-0.29$  (95% CI =  $-0.39$  to  $-0.20$ ). The corresponding random effects risk ratio was 0.75 (95% CI = 0.68 to 0.82), which shows a statistically significant overall lower risk of dementia in middle-age and older adults that engaged in regular (i.e., moderate-vigorous intensity) physical activity compared to their non-active counterparts (Table 1). However, total heterogeneity between the studies was high ( $I^2=92.5\%$ ). To explore this further, subgroup analysis was performed using the prespecified subgroups of age and follow-up duration to assess heterogeneity. The pattern of associations remained consistent while heterogeneity was reduced in the sub-group analyses (Table 1), but it does remain high suggesting other potential sources of heterogeneity.

### Sleep

A total of 17 articles met the inclusion criteria for quantitative synthesis as it relates to sleep [76,93–103,104–108]. Together, these studies included 1,344,170 participants, of whom 49,581 (3.7%) were diagnosed with dementia at follow-up. The mean age across studies was 67.5 years, and the mean follow-up duration was 12.1 years. All 17 studies examined both short (< 7 hours) and long (> 8 hours) nightly sleep durations in relation to dementia risk, each comparing these to optimal sleep (7–8 hours per night). Across these studies, eight (47.1%) reported a statistically significant higher risk of dementia among short sleepers, and nine (52.9%) reported a higher risk among long sleepers. The random effects model showed a statistically significant risk of dementia for short (< 7 hours) sleepers ( $k=17$ ; log risk ratio = 0.17, 0.09 to 0.25; risk ratio = 1.18, 1.09 to 1.28;  $I^2=41.1\%$ ), and long (> 8 hours) sleepers ( $k=17$ ; log risk ratio = 0.25, 0.14 to 0.36; risk ratio = 1.28, 1.15 to 1.43;  $I^2=66.9\%$ ), compared to regular sleepers (7–8 hours of sleep). Subgroup analysis was performed with age and follow-up duration to assess heterogeneity in short and long sleepers (see Table 2). Overall heterogeneity in sleep study results was moderate to substantial but was lowest in studies of participants aged 35–64 years with follow-up periods  $\geq 10$  years.

### Sedentary

In terms of sedentary duration, only three studies [68,109,110] met the criteria for quantitative synthesis. These studies followed 295,809 participants in total, of whom 6,212 (2.1%) were diagnosed with dementia. Participants had a mean age of 66.5 years, and the average follow-up period was 7.6 years. Two out of three (66.7%) studies with prolonged sitting time (8+ hours of daily sitting) reported a statistically significant higher risk of dementia compared to less sitting time (< 8 hours of daily sitting). The random effects model revealed a statistically significant higher risk of dementia for prolonged sitting time ( $k=3$ ; log risk ratio = 0.24, 0.15 to 0.33; risk ratio = 1.27, 1.17 to 1.39;  $I^2=0\%$ ) (see Table 3).

### Risk of bias

ROBINS Risk of Bias assessment (S9–S11 Tables) demonstrated moderate risk of bias for the majority of physical activity studies (low:  $n=3$  (6.1%); moderate:  $n=34$  (69.4%), and serious:  $n=12$  (24.5%) out of 49 studies), and sleep studies

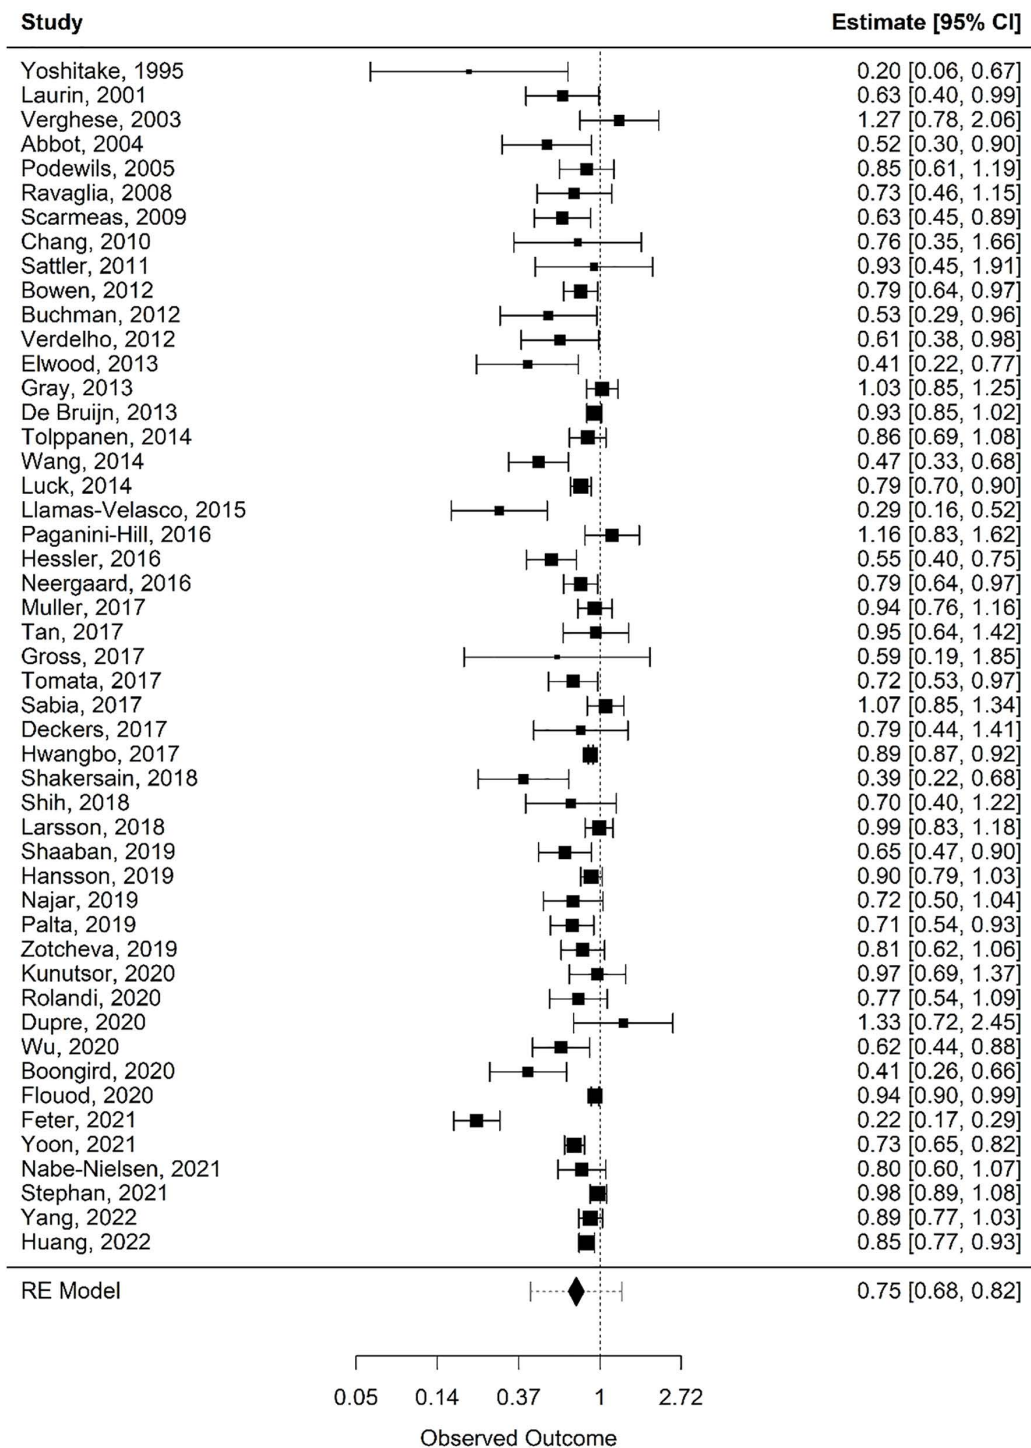

**Fig 2. Forest plot: physical activity.** Random-effects meta-analysis for associations between physical activity and incident dementia.

<https://doi.org/10.1371/journal.pone.0343621.g002>

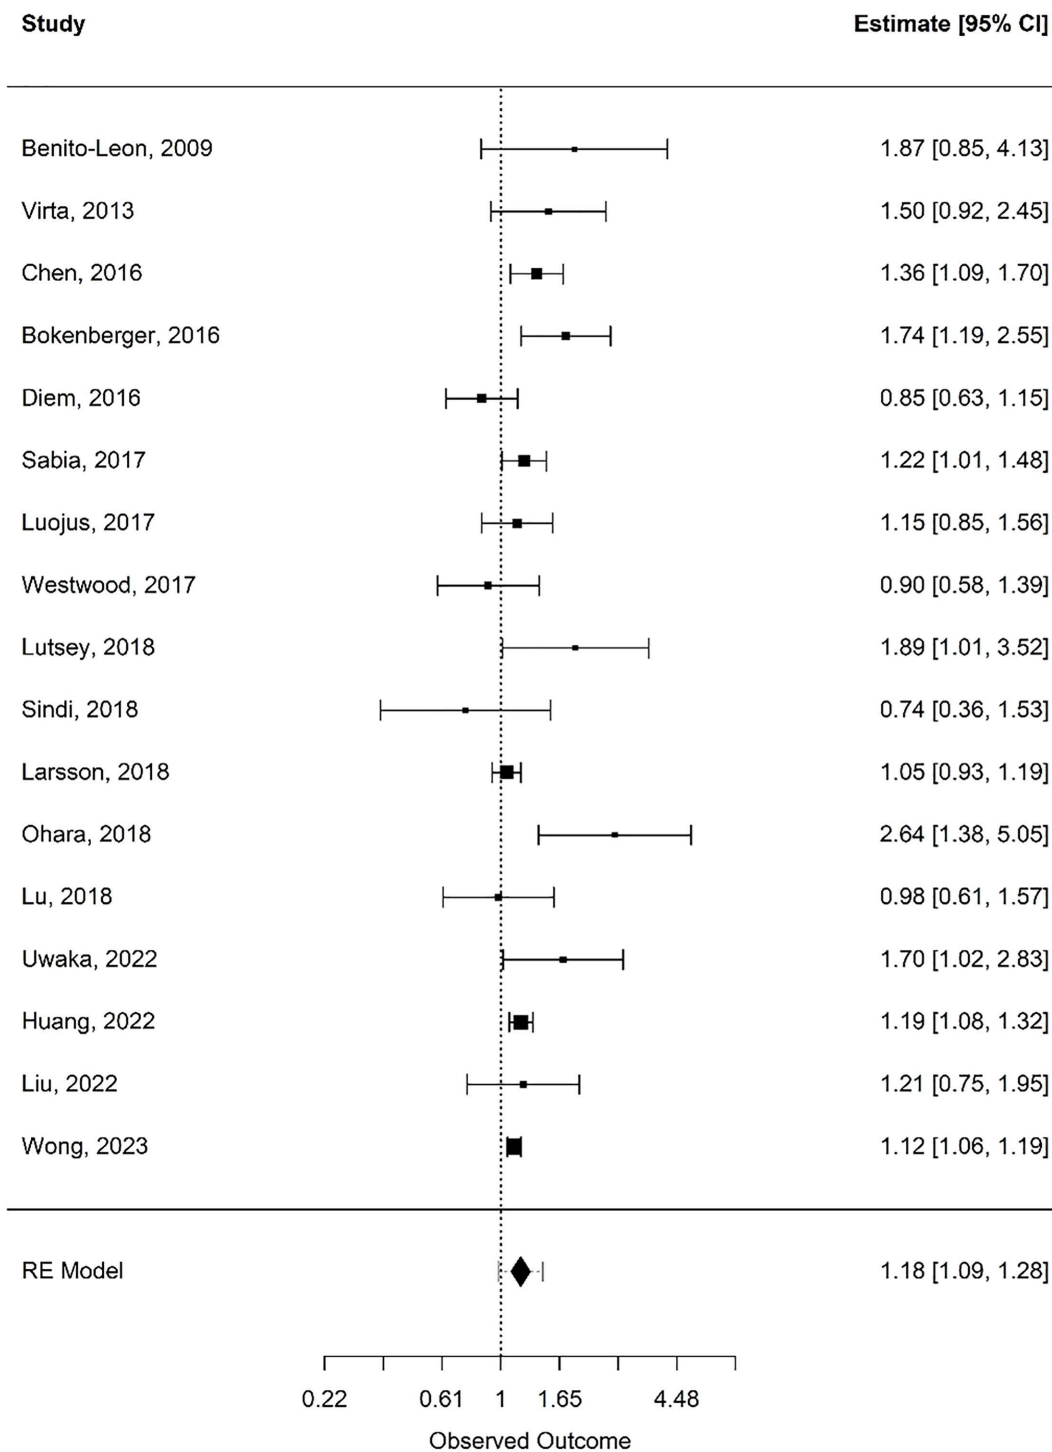

**Fig 3. Forest plot: short sleep duration.** Random-effects meta-analysis for associations between short sleep duration and incident dementia.

<https://doi.org/10.1371/journal.pone.0343621.g003>

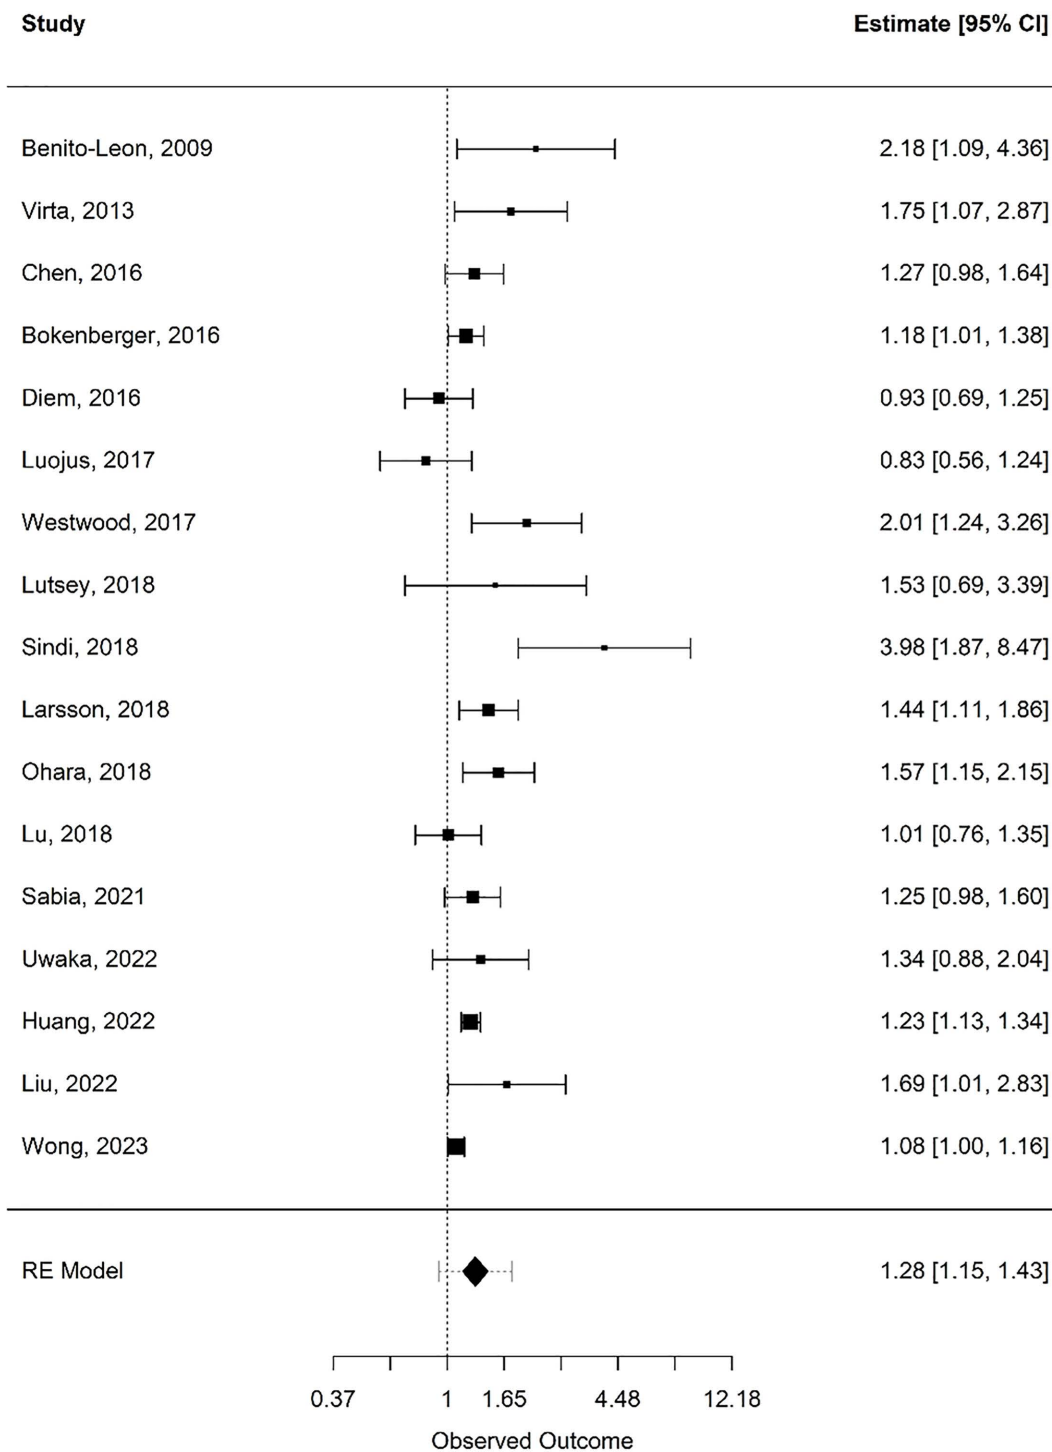

**Fig 4. Forest plot: long sleep duration.** Random-effects meta-analysis for associations between long sleep duration and incident dementia.

<https://doi.org/10.1371/journal.pone.0343621.g004>

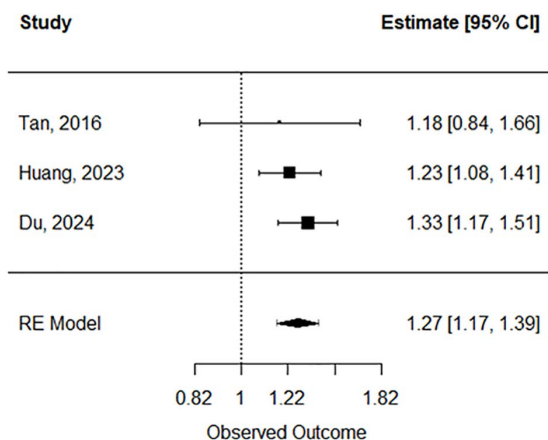

**Fig 5. Forest plot: sedentary behaviour.** Random-effects model meta-analysis for associations between sedentary behaviour and incident dementia.

<https://doi.org/10.1371/journal.pone.0343621.g005>

**Table 1. Meta-Analysis of Physical Activity studies. Associations between physical activity and incident dementia.**

| Outcomes                                                     | No. of studies | Effect estimate (RR) | 95% CI       | <i>P</i> (%) |
|--------------------------------------------------------------|----------------|----------------------|--------------|--------------|
| <b>Main analysis</b>                                         |                |                      |              |              |
| Physical Activity                                            | 49             | 0.75                 | 0.68 to 0.82 | 92.5         |
| <b>Subgroup analyses</b>                                     |                |                      |              |              |
| Aged 35–64 years                                             | 20             | 0.76                 | 0.64 to 0.89 | 96.9         |
| 65 years and older                                           | 29             | 0.74                 | 0.66 to 0.82 | 73.9         |
| Short follow-up duration (under 10 years)                    | 29             | 0.72                 | 0.65 to 0.81 | 79.2         |
| Long follow-up duration (10 years and over)                  | 20             | 0.78                 | 0.67 to 0.92 | 86.2         |
| Aged 35–64 years old with short follow-up (under 10 years)   | 4              | 0.75                 | 0.57 to 0.98 | 86.3         |
| Aged 35–64 years old with long follow-up (10 years and over) | 16             | 0.76                 | 0.63 to 0.93 | 97.4         |
| 65 years and older with short follow-up (under 10 years)     | 25             | 0.72                 | 0.63 to 0.81 | 76.8         |
| 65 years and older with long follow-up (10 years and over)   | 4              | 0.89                 | 0.75 to 1.06 | 28.4         |

Abbreviations: RR, risk ratio; CI, confidence interval.

<https://doi.org/10.1371/journal.pone.0343621.t001>

(low:  $n = 1$  (5.9%); moderate:  $n = 12$  (70.6%), and serious:  $n = 4$  (23.5%) out of 17 studies), and there was a serious risk of bias for the majority of sedentary studies (moderate,  $n = 1$  (33.3%), and serious,  $n = 2$  (66.7%) out of three studies). When present, the primary risk of moderate or serious bias was the result of bias due to confounding, followed by bias due to missing data. Common confounding variables included demographic factors (age, sex, education), genetic risk factors (e.g., apolipoprotein E (APOE)  $\epsilon 4$  status), vascular or metabolic comorbidities (hypertension, diabetes, cardiovascular disease), baseline cognitive function, lifestyle behaviours (smoking, alcohol, BMI), and psychosocial factors (depression, social support). Most studies showed low risk of bias across selection, intervention, outcome measurement, and reporting domains, whereas the greatest variability was found for bias due to confounding. Measurement of physical activity, sleep, and dementia classification were the larger contributors to overall risk of bias, with both mixed outcome studies (e.g., Mild cognitive impairment (MCI)/AD/dementia) or more fitness-based assessment of physical activity showing increased risk of bias.

**Table 2. Meta-Analysis of Sleep studies. Associations between sleep duration and incident dementia.**

| Outcomes                                                              | No. of studies | Effect estimate (RR) | 95% CI       | I <sup>2</sup> (%) |
|-----------------------------------------------------------------------|----------------|----------------------|--------------|--------------------|
| <b>Main analysis</b>                                                  |                |                      |              |                    |
| Short Sleepers                                                        | 17             | 1.18                 | 1.09 to 1.28 | 41.1               |
| Long Sleepers                                                         |                | 1.28                 | 1.15 to 1.43 | 66.9               |
| <b>Subgroup analyses: Short Sleepers</b>                              |                |                      |              |                    |
| Aged 35–64 years <sup>a</sup>                                         | 5              | 1.17                 | 1.06 to 1.29 | 17.4               |
| 65 years and older                                                    | 12             | 1.20                 | 1.03 to 1.39 | 64.1               |
| Short follow-up duration (under 10 years) <sup>b</sup>                | 8              | 1.20                 | 0.98 to 1.46 | 59.8               |
| Long follow-up duration (10 years and over)                           | 9              | 1.19                 | 1.07 to 1.32 | 45.5               |
| Aged 35–64 years with long follow-up (10 years and over) <sup>a</sup> | 5              | 1.17                 | 1.06 to 1.29 | 17.4               |
| 65 years and older with short follow-up (under 10 years) <sup>b</sup> | 8              | 1.20                 | 0.98 to 1.46 | 59.8               |
| 65 years and older with long follow-up (10 years and over)            | 4              | 1.22                 | 0.92 to 1.63 | 66.0               |
| <b>Subgroup analyses: Long Sleepers</b>                               |                |                      |              |                    |
| Aged 35–64 years <sup>c</sup>                                         | 5              | 1.09                 | 1.02 to 1.18 | 1.1                |
| 65 years and older                                                    | 12             | 1.39                 | 1.19 to 1.62 | 72.2               |
| Short follow-up duration (under 10 years) <sup>d</sup>                | 8              | 1.39                 | 1.10 to 1.76 | 80.1               |
| Long follow-up duration (10 years and over)                           | 9              | 1.25                 | 1.09 to 1.42 | 55.5               |
| Aged 35–64 years with long follow-up (10 years and over) <sup>c</sup> | 5              | 1.09                 | 1.02 to 1.18 | 1.1                |
| 65 years and older with short follow-up (under 10 years) <sup>d</sup> | 8              | 1.39                 | 1.1 to 1.76  | 80.1               |
| 65 years and older with long follow-up (10 years and over)            | 4              | 1.44                 | 1.15 to 1.82 | 55.7               |

Abbreviations: RR, risk ratio; CI, confidence interval

<sup>a-b)</sup> Short Sleepers: Ages 35–64 and ages 35–64 with ≥10 years' follow-up, and short follow-up (<10 years) and ages ≥65 with short follow-up, comprise the same underlying study populations; results are identical and reported in both rows for completeness.

<sup>c-d)</sup> Long Sleepers: Ages 35–64 and ages 35–64 with ≥10 years' follow-up, and short follow-up (<10 years) and ages ≥65 with short follow-up, comprise the same underlying study populations; results are identical and reported in both rows for completeness.

<https://doi.org/10.1371/journal.pone.0343621.t002>

**Table 3. Meta-Analysis of Sedentary Behaviour studies. Associations between sedentary behaviour and incident dementia.**

| Outcomes             | No. of studies | Effect estimate (RR) | 95% CI       | I <sup>2</sup> (%) |
|----------------------|----------------|----------------------|--------------|--------------------|
| <b>Main analysis</b> |                |                      |              |                    |
| Sedentary Behaviour  | 3              | 1.27                 | 1.17 to 1.39 | 0                  |

Abbreviations: RR, risk ratio; CI, confidence interval.

Note: Although heterogeneity was estimated as 0%, the small number of studies limits the ability to detect variability; results should therefore be interpreted with caution.

<https://doi.org/10.1371/journal.pone.0343621.t003>

## Discussion

Results of this SRMA showed that adhering to established or recommended physical activity (PA) levels was associated with significantly lower incidence (25% reduced risk) of all-cause dementia; however, considerable heterogeneity in the random effects model for physical activity suggests unexplained variability. While we have investigated potential sources including baseline age differences, and follow-up duration, as well as controlling for potential confounders using adjusted models, additional sources of heterogeneity cannot be dismissed. Our SRMA also found that either short or long nightly sleep duration was associated with a 18% and 28% higher risk of dementia, respectively, compared to recommended 7–8-hour levels, with only moderate or substantial heterogeneity between studies. Finally, prolonged sedentary time was associated with a 27% higher risk of dementia, compared to recommended level (i.e., <8 hours), and heterogeneity between studies was low.

These results are consistent with previous meta-analyses that showed an association between physical activity and all-cause dementia, including a 38% reduced risk in the most physically active, compared to less active counterparts [34–36,111]. However, our SRMA expands these findings with more recent studies from larger, diverse populations (primarily from high-income countries, with variation in age, sex, and, where reported, race/ethnicity), with longer follow-up times, and by focusing on middle- and older-age adults more broadly. Although heterogeneity was moderate-to-substantial, physical activity studies with older baseline ages and/or shorter follow-up periods had less heterogeneity. This is expected considering the challenges with long-term tracking of physical activity in older populations. As such, many studies examining physical activity in older age tend to have follow-up durations of less than 10 years [112–114]. Furthermore, our SRMA included studies with adults aged 35–64 years at baseline; however, heterogeneity was relatively high, which also increased with long-term tracking.

In the studies included in our sleep analysis, sleep duration was consistently categorized into short, regular, and long nightly sleep, with regular sleep (7–8 hours) as the reference category. Risk estimates were reported for both short and long sleep within the same study. While a recent meta-analysis found that only long sleep duration was associated with dementia [115], our study showed that nightly sleep both below and beyond 7–8 hours was associated with higher incidence of all-cause dementia, and the risk was higher with long sleep duration. These findings align with prior research examining sleep and broader cognitive outcomes [96,102,116]. Of note, few longitudinal studies investigated the relationship between regular sleep and incident dementia [117], and future studies involving midlife and longer follow-ups are needed to better ascertain these relationships [106,118,119].

Prolonged sedentary behaviour is associated with poorer physical health, including obesity, diabetes, and cardiovascular disease [21]. These conditions are associated with reduced physical functioning and increase limitations in daily tasks needed to care for oneself and live independently, which are known dementia risk factors [120]. Although the search strategy was comprehensive, several identified records (n=4) did not explicitly investigate or adequately describe sedentary behaviour [65,121–123], limiting their inclusion in quantitative synthesis. Nevertheless, a small number of longitudinal studies demonstrate associations between sedentary time and dementia risk. Across these studies, longer sedentary duration was associated with higher risk of dementia. Sedentary behaviour recently began to be recognized as a distinct modifiable behaviour around 2012 [124,125]. As a result, several large cohort studies did not capture detailed or validated measures of sedentary behaviour [124]. Moreover, in some studies, low physical activity was characterized as sedentary behaviour though they are now recognized as distinct and different behaviours as opposed to two ends of one continuous spectrum [125,126,127]. Although prolonged sedentary time might have adverse independent effects on brain health such as cognitive decline, or mild cognitive impairment [128], evidence regarding incident dementia as a clinical endpoint remained limited, largely due to insufficient follow-up periods and the relative scarcity of high-quality sedentary behaviour data.

Lifestyle modifications are common public health interventions that could have durable effects in the prevention and delay of dementia [129,130]. Although the potential mechanisms and pathways are not fully understood [128], increased

physical activity with reduced sedentary time has been shown to improve physical function [129], and quality of life in older adults [131,132]. Indeed, regular physical activity stimulates antioxidative (protective) processes, which enhance blood flow, brain vasculature, and hippocampal volume [133]. Regular physical activity has also been found to increase brain-derived neurotrophic factor (BDNF) and insulin-like growth factor (IGF-1), which confer neuroprotection and neurotransmitter integrity [134,135]. Importantly, the proposed mechanisms of physical activity, sedentary time, and sleep on brain health are not mutually exclusive, and may act through, or on other established chronic disease risk factors [136,137]. In the sleep-dementia relationship, the glymphatic system is most active during sleep to regulate inflammation in the brain [136,137], and the process of brain aging may be accelerated by suboptimal sleep [136]. When coupled with physical inactivity, sleep disruption can exacerbate the atrophy of brain structures [138]. Although the mechanisms underlying long sleep are less well understood, studies suggest potential roles for underlying comorbidities, systemic inflammation, or early neurodegenerative changes [115,135]. Taken together, a healthy movement behaviour profile may promote vascular, neurotrophic, and anti-inflammatory effects that collectively support brain health and may delay the onset or progression of dementia.

### Strengths and limitations

Strengths of this study include: i) valid and reliable risk estimates of dementia using clinical diagnoses, ii) pooling of large community-dwelling population-based cohorts with long-term follow-ups increased statistical power to detect these effects, iii) the breadth of countries and diverse populations, which allowed for a robust analysis of these measures and generalizability of results, and iv) assessment of publication bias using visual inspection of the funnel plot. Nonetheless, our approach also had some limitations. First, heterogeneity across physical activity studies requires further investigation into potential unexplained factors. Second, while reverse causation is unlikely given the exclusion of participants with dementia at baseline, it cannot be entirely ruled out in studies with short follow-up periods. In such cases, participants may already have early symptoms of dementia that were not formally diagnosis. Physical activity, sedentary behaviours, and sleep were self-reported, and sleep *quality* was not accounted for; therefore, interpretations of results should include careful consideration of recall bias. Objective measures (e.g., wearable devices) of physical activity, sedentary time, and sleep could enhance internal validity of study findings by providing timely, accurate, and detailed understanding of movement behaviours in middle- and older-age adults with limitations in physical fitness and recall. However, there is no universally accepted standard for measuring these behaviours, and different types of objective measures may yield varying results [124]. Comparison of our self-report findings should therefore be compared to a future SRMA with objective measures, as their use in cohort studies becomes more common.

The presence of moderate or serious risk of bias across studies (particularly due to confounding and missing data) has important implications for interpretation of our findings. Of note residual and unmeasured confounding (e.g., pre-existing health conditions, functional status, socioeconomic status, and health behaviours correlated with movement behaviours) may have inflated or attenuated observed associations. In addition, differential loss to follow-up and incomplete outcome ascertainment could have introduced selection bias. Taken together, these types of bias preclude causal inference and mean that our pooled estimates should be interpreted as associations rather than causal effects. Future studies would benefit from repeated measures of movement behaviours, and improved retention to reduce missing data and strengthen causal inference.

Although most studies accounted for key variables such as age, sex, and education, fewer studies additionally adjusted for comorbidities or lifestyle factors. Future studies could further mitigate confounding by comprehensive baseline assessment and statistical adjustment of relevant variables. Further sensitivity analyses to assess the robustness of findings, for example by adjusting for additional covariates or examining subgroups (e.g., sex, age, genetic risk), would strengthen the literature base overall. Finally, future studies should also aim to include participants from underrepresented populations, with particular emphasis on low- and middle-income countries, to broaden the geographic and socioeconomic

representation of research. Given the demographics of the existing pool of studies, variability across studies should be interpreted in the context of broader social determinants of health and structural inequities.

Given that dementia could precede a clinical diagnosis by a decade [7], generalizability of evidence-based research on modifiable risk factors of dementia is a notable challenge [11]. Dementia has a long preclinical or prodromal period [7,8], which contributes to variability in the time to diagnosis of dementia. In the study of physical activity and sleep with dementia, this could contribute to reverse causation, particularly in light of our reliance on self-reported (behavioural) measures of physical activity and sleep [139]; however, decreases in physical activity across time would bias our results to the null. Our meta-analysis considered age (35–64 or 65 + y) and follow-up (<10 or 10 + y), and results did not change substantially; however, heterogeneity between studies reinforced the influence of other unmeasured factors. Previous research reported significant results with short (below 10 years) follow-ups [36,37] or in older (65 + years) populations [34,35]. Across all included studies, sex-specific analyses were rare. Some cohorts included only females or only males, and very few studies reported results stratified by sex. As a result, our ability to examine sex differences in dementia risk was limited. Indeed, building on previous meta-analyses with incident dementia [36,111,115], more studies with mid-life changes in physical activity, sedentary time, and sleep, and longer follow-ups are needed to ascertain the effects of changes in physical activity and sleep on dementia. Future studies, including compositional analyses to examine how reallocating time across movement behaviours influences cognitive decline and the development of dementia, are needed to further clarify these associations [41]. To enhance representation, studies should include diverse cohorts and present results disaggregated by sex to provide a clearer understanding of sex differences.

Findings from this review highlight opportunities for tailored public health strategies to support brain health in middle- and older-age adults. Technology-assisted tools (such as wearable activity trackers or smartphone apps) can help monitor and encourage physical activity, reduce sedentary behaviour, and support healthy routines. The use of personalized interactive prompts (based on past activity and personal interests) within these digital tools represents an emerging area of research that may support short-term uptake and facilitate longer-term behaviour change. Community programs (such as group exercise classes, walking groups, or educational activities related to sleep) may provide structured opportunities for movement, while broader policy initiatives, including accessible green spaces and workplace practices that reduce prolonged sitting, may support population-level approaches to healthier daily routines.

## Conclusion

Our study shows that the physical activity, increased sedentary time, and short or long sleep duration outside the recommended range were associated with increased risk of dementia. Future studies with longer-term follow-up and larger sample sizes to address issues of dose-response and alterability in the movement behaviour-dementia relationships are needed to better understand these relationships. Taken together, our findings have important clinical implications that could inform guidelines across the life course, including implementation of tailored public health strategies. Whether changes in physical activity, sleep, or sedentary behaviour – a construct distinct from physical inactivity – is also related to dementia, and whether these associations are independent of risk factors such as pre-existing health risks, remain areas in need of future work.

## Supporting information

**S1 Table. Search strategy example.** MEDLINE search terms and results.  
(PDF)

**S2 Table. Study characteristics: physical activity.** Association between physical activity and dementia risk.  
(PDF)

**S3 Table. Study characteristics: sleep duration.** Association between sleep duration and dementia risk.  
(PDF)

**S4 Table. Study characteristics: sedentary behaviour.** Association between sedentary behaviour and dementia risk.  
(PDF)

**S5 Fig. Funnel plot: physical activity.** Graphical representation of publication bias for associations between physical activity and incident dementia.  
(PDF)

**S6 Fig. Funnel plot: short sleep.** Graphical representation of publication bias for associations between short sleep and incident dementia.  
(PDF)

**S7 Fig. Funnel plot: long sleep.** Graphical representation of publication bias for associations between long sleep and incident dementia.  
(PDF)

**S8 Fig. Funnel plot: sedentary behaviour.** Graphical representation of publication bias for associations between sedentary behaviour and incident dementia.  
(PDF)

**S9 Table. Risk of bias assessment: physical activity.** Association between physical activity and dementia.  
(PDF)

**S10 Table. Risk of bias assessment: sleep duration.** Association between sleep duration and dementia.  
(PDF)

**S11 Table. Risk of bias assessment: sedentary time.** Association between sedentary time and dementia.  
(PDF)

**S1 File. PRISMA 2020 Checklist.**  
(DOCX)

## Author contributions

**Conceptualization:** Akinkunle Oye-Somefun, Chris I. Ardern.

**Data curation:** Akinkunle Oye-Somefun, Parmis Mirzadeh, Jenny Gao-Kang.

**Formal analysis:** Akinkunle Oye-Somefun.

**Investigation:** Akinkunle Oye-Somefun, Parmis Mirzadeh.

**Methodology:** Akinkunle Oye-Somefun, Parmis Mirzadeh, Michael Rotondi, Jennifer L. Kuk, Hala Tamim, Chris I. Ardern.

**Project administration:** Akinkunle Oye-Somefun, Parmis Mirzadeh, Jenny Gao-Kang.

**Supervision:** Chris I. Ardern.

**Validation:** Chris I. Ardern.

**Visualization:** Akinkunle Oye-Somefun.

**Writing – original draft:** Akinkunle Oye-Somefun.

**Writing – review & editing:** Akinkunle Oye-Somefun, Parmis Mirzadeh, Jenny Gao-Kang, Michael Rotondi, Jennifer L. Kuk, Hala Tamim, Chris I. Ardern.

## References

1. Tinetti ME, McAvay GJ, Murphy TE, Gross CP, Lin H, Allore HG. Contribution of individual diseases to death in older adults with multiple diseases. *J Am Geriatr Soc.* 2012;60(8):1448–56. <https://doi.org/10.1111/j.1532-5415.2012.04077.x> PMID: [22734792](https://pubmed.ncbi.nlm.nih.gov/22734792/)
2. Alzheimer's disease facts and figures. *Alzheimers Dement.* 2021;17(3):327–406. <https://doi.org/10.1002/alz.12328>
3. Prince M, Wimo A, Guerchet M, Ali GC, Wu Y, Prina M. World Alzheimer Report 2015: The global impact of dementia: an analysis of prevalence, incidence, cost and trends. London: Alzheimer's Disease International. 2015. <https://www.alzint.org/resource/world-alzheimer-report-2015/>
4. Patterson C. World Alzheimer Report 2018. The State of the Art of Dementia Research: New Frontiers. An Analysis of Prevalence, Incidence, Cost and Trends. Alzheimer's Disease International. 2018. <https://www.alzint.org/u/WorldAlzheimerReport2018.pdf>
5. Wimo A, Guerchet M, Ali G-C, Wu Y-T, Prina AM, Winblad B, et al. The worldwide costs of dementia 2015 and comparisons with 2010. *Alzheimers Dement.* 2017;13(1):1–7. <https://doi.org/10.1016/j.jalz.2016.07.150> PMID: [27583652](https://pubmed.ncbi.nlm.nih.gov/27583652/)
6. Wortmann M. Dementia: a global health priority - highlights from an ADI and World Health Organization report. *Alzheimers Res Ther.* 2012;4(5):40. <https://doi.org/10.1186/alzrt143> PMID: [22995353](https://pubmed.ncbi.nlm.nih.gov/22995353/)
7. Jack CR Jr, Knopman DS, Jagust WJ, Petersen RC, Weiner MW, Aisen PS, et al. Tracking pathophysiological processes in Alzheimer's disease: an updated hypothetical model of dynamic biomarkers. *Lancet Neurol.* 2013;12(2):207–16. [https://doi.org/10.1016/S1474-4422\(12\)70291-0](https://doi.org/10.1016/S1474-4422(12)70291-0) PMID: [23332364](https://pubmed.ncbi.nlm.nih.gov/23332364/)
8. Wu Y-T, Beiser AS, Breteler MMB, Fratiglioni L, Helmer C, Hendrie HC, et al. The changing prevalence and incidence of dementia over time - current evidence. *Nat Rev Neurol.* 2017;13(6):327–39. <https://doi.org/10.1038/nrneuro.2017.63> PMID: [28497805](https://pubmed.ncbi.nlm.nih.gov/28497805/)
9. Erickson KI, Weinstein AM, Lopez OL. Physical activity, brain plasticity, and Alzheimer's disease. *Arch Med Res.* 2012;43(8):615–21. <https://doi.org/10.1016/j.arcmed.2012.09.008> PMID: [23085449](https://pubmed.ncbi.nlm.nih.gov/23085449/)
10. Fredman G, Ozcan L, Tabas I. Common therapeutic targets in cardiometabolic disease. *Sci Transl Med.* 2014;6(239):239ps5. <https://doi.org/10.1126/scitranslmed.3008908> PMID: [24898746](https://pubmed.ncbi.nlm.nih.gov/24898746/)
11. Anstey KJ, Ee N, Eramudugolla R, Jagger C, Peters R. A Systematic Review of Meta-Analyses that Evaluate Risk Factors for Dementia to Evaluate the Quantity, Quality, and Global Representativeness of Evidence. *J Alzheimers Dis.* 2019;70(s1):S165–86. <https://doi.org/10.3233/JAD-190181> PMID: [31306123](https://pubmed.ncbi.nlm.nih.gov/31306123/)
12. Livingston G, Sommerlad A, Orgeta V, Costafreda SG, Huntley J, Ames D, et al. Dementia prevention, intervention, and care. *Lancet.* 2017;390(10113):2673–734. [https://doi.org/10.1016/S0140-6736\(17\)31363-6](https://doi.org/10.1016/S0140-6736(17)31363-6) PMID: [28735855](https://pubmed.ncbi.nlm.nih.gov/28735855/)
13. Williams JW, Plassman BL, Burke J, Benjamin S. Preventing Alzheimer's disease and cognitive decline. *Evid Rep Technol Assess (Full Rep).* 2010;193:1–727.
14. Tian Q, Glynn NW, Erickson KI, Aizenstein HJ, Simonsick EM, Yaffe K, et al. Objective measures of physical activity, white matter integrity and cognitive status in adults over age 80. *Behav Brain Res.* 2015;284:51–7. <https://doi.org/10.1016/j.bbr.2015.01.045> PMID: [25655514](https://pubmed.ncbi.nlm.nih.gov/25655514/)
15. Lipnicki DM, Makkar SR, Crawford JD, Thalamuthu A, Kochan NA, Lima-Costa MF, et al. Determinants of cognitive performance and decline in 20 diverse ethno-regional groups: A COSMIC collaboration cohort study. *PLoS Med.* 2019;16(7):e1002853. <https://doi.org/10.1371/journal.pmed.1002853> PMID: [31335910](https://pubmed.ncbi.nlm.nih.gov/31335910/)
16. de Bruijn RFAG, Schrijvers EMC, de Groot KA, Witteman JCM, Hofman A, Franco OH, et al. The association between physical activity and dementia in an elderly population: the Rotterdam Study. *Eur J Epidemiol.* 2013;28(3):277–83. <https://doi.org/10.1007/s10654-013-9773-3> PMID: [23385659](https://pubmed.ncbi.nlm.nih.gov/23385659/)
17. Wolters FJ, Chibnik LB, Waziry R, Anderson R, Berr C, Beiser A, et al. Twenty-seven-year time trends in dementia incidence in Europe and the United States: The Alzheimer Cohorts Consortium. *Neurology.* 2020;95(5):e519–31. <https://doi.org/10.1212/WNL.0000000000001022> PMID: [32611641](https://pubmed.ncbi.nlm.nih.gov/32611641/)
18. Matthews FE, Stephan BCM, Robinson L, Jagger C, Barnes LE, Arthur A, et al. A two decade dementia incidence comparison from the Cognitive Function and Ageing Studies I and II. *Nat Commun.* 2016;7:11398. <https://doi.org/10.1038/ncomms11398> PMID: [27092707](https://pubmed.ncbi.nlm.nih.gov/27092707/)
19. Satizabal CL, Beiser AS, Chouraki V, Chêne G, Dufouil C, Seshadri S. Incidence of Dementia over Three Decades in the Framingham Heart Study. *N Engl J Med.* 2016;374(6):523–32. <https://doi.org/10.1056/NEJMoa1504327> PMID: [26863354](https://pubmed.ncbi.nlm.nih.gov/26863354/)
20. GBD 2019 Dementia Forecasting Collaborators. Estimation of the global prevalence of dementia in 2019 and forecasted prevalence in 2050: an analysis for the Global Burden of Disease Study 2019. *Lancet Public Health.* 2022;7(2):e105–25. [https://doi.org/10.1016/S2468-2667\(21\)00249-8](https://doi.org/10.1016/S2468-2667(21)00249-8)
21. Dempsey PC, Owen N, Biddle SJH, Dunstan DW. Managing sedentary behavior to reduce the risk of diabetes and cardiovascular disease. *Curr Diab Rep.* 2014;14(9):522. <https://doi.org/10.1007/s11892-014-0522-0> PMID: [25052856](https://pubmed.ncbi.nlm.nih.gov/25052856/)
22. Jensen CS, Hasselbalch SG, Waldemar G, Simonsen AH. Biochemical Markers of Physical Exercise on Mild Cognitive Impairment and Dementia: Systematic Review and Perspectives. *Front Neurol.* 2015;6:187. <https://doi.org/10.3389/fneur.2015.00187> PMID: [26379621](https://pubmed.ncbi.nlm.nih.gov/26379621/)
23. Lok N, Lok S, Canbaz M. The effect of physical activity on depressive symptoms and quality of life among elderly nursing home residents: Randomized controlled trial. *Arch Gerontol Geriatr.* 2017;70:92–8. <https://doi.org/10.1016/j.archger.2017.01.008> PMID: [28110207](https://pubmed.ncbi.nlm.nih.gov/28110207/)
24. Puciato D, Borysiuk Z, Rozpara M. Quality of life and physical activity in an older working-age population. *Clin Interv Aging.* 2017;12:1627–34. <https://doi.org/10.2147/CIA.S144045> PMID: [29042763](https://pubmed.ncbi.nlm.nih.gov/29042763/)

25. Grandner MA, Hale L, Moore M, Patel NP. Mortality associated with short sleep duration: The evidence, the possible mechanisms, and the future. *Sleep Med Rev.* 2010;14(3):191–203. <https://doi.org/10.1016/j.smrv.2009.07.006> PMID: [19932976](https://pubmed.ncbi.nlm.nih.gov/19932976/)
26. Spira AP, Chen-Edinboro LP, Wu MN, Yaffe K. Impact of sleep on the risk of cognitive decline and dementia. *Curr Opin Psychiatry.* 2014;27(6):478–83. <https://doi.org/10.1097/YCO.000000000000106> PMID: [25188896](https://pubmed.ncbi.nlm.nih.gov/25188896/)
27. Ma Y, Liang L, Zheng F, Shi L, Zhong B, Xie W. Association Between Sleep Duration and Cognitive Decline. *JAMA Netw Open.* 2020;3(9):e2013573. <https://doi.org/10.1001/jamanetworkopen.2020.13573> PMID: [32955572](https://pubmed.ncbi.nlm.nih.gov/32955572/)
28. Ferrie JE, Kumari M, Salo P, Singh-Manoux A, Kivimäki M. Sleep epidemiology—a rapidly growing field. *Int J Epidemiol.* 2011;40(6):1431–7. <https://doi.org/10.1093/ije/dyr203> PMID: [22158659](https://pubmed.ncbi.nlm.nih.gov/22158659/)
29. Howard C, Mukadam N, Hui EK, Livingston G. The effects of sleep duration on the risk of dementia incidence in short and long follow-up studies: A systematic review and meta-analysis. *Sleep Med.* 2024;124:522–30. <https://doi.org/10.1016/j.sleep.2024.10.022> PMID: [39442346](https://pubmed.ncbi.nlm.nih.gov/39442346/)
30. Keadle SK, McKinnon R, Graubard BI, Troiano RP. Prevalence and trends in physical activity among older adults in the United States: A comparison across three national surveys. *Prev Med.* 2016;89:37–43. <https://doi.org/10.1016/j.ypmed.2016.05.009> PMID: [27196146](https://pubmed.ncbi.nlm.nih.gov/27196146/)
31. van Uffelen JGZ, Khan A, Burton NW. Gender differences in physical activity motivators and context preferences: a population-based study in people in their sixties. *BMC Public Health.* 2017;17(1):624. <https://doi.org/10.1186/s12889-017-4540-0> PMID: [28676081](https://pubmed.ncbi.nlm.nih.gov/28676081/)
32. Brookmeyer R, Evans DA, Hebert L, Langa KM, Heeringa SG, Plassman BL, et al. National estimates of the prevalence of Alzheimer's disease in the United States. *Alzheimers Dement.* 2011;7(1):61–73. <https://doi.org/10.1016/j.jalz.2010.11.007> PMID: [21255744](https://pubmed.ncbi.nlm.nih.gov/21255744/)
33. Livingston G, Huntley J, Liu KY, Costafreda SG, Selbæk G, Alladi S, et al. Dementia prevention, intervention, and care: 2024 report of the Lancet standing Commission. *Lancet.* 2024;404(10452):572–628. [https://doi.org/10.1016/S0140-6736\(24\)01296-0](https://doi.org/10.1016/S0140-6736(24)01296-0) PMID: [39096926](https://pubmed.ncbi.nlm.nih.gov/39096926/)
34. Guure CB, Ibrahim NA, Adam MB, Said SM. Impact of Physical Activity on Cognitive Decline, Dementia, and Its Subtypes: Meta-Analysis of Prospective Studies. *Biomed Res Int.* 2017;2017:9016924. <https://doi.org/10.1155/2017/9016924> PMID: [28271072](https://pubmed.ncbi.nlm.nih.gov/28271072/)
35. Xu W, Wang HF, Wan Y, Tan C-C, Yu J-T, Tan L. Leisure time physical activity and dementia risk: a dose-response meta-analysis of prospective studies. *BMJ Open.* 2017;7(10):e014706. <https://doi.org/10.1136/bmjopen-2016-014706> PMID: [29061599](https://pubmed.ncbi.nlm.nih.gov/29061599/)
36. Blondell SJ, Hammersley-Mather R, Veerman JL. Does physical activity prevent cognitive decline and dementia?: A systematic review and meta-analysis of longitudinal studies. *BMC Public Health.* 2014;14:510. <https://doi.org/10.1186/1471-2458-14-510> PMID: [24885250](https://pubmed.ncbi.nlm.nih.gov/24885250/)
37. Kivimäki M, Singh-Manoux A, Pentti J, Sabia S, Nyberg ST, Alfredsson L, et al. Physical inactivity, cardiometabolic disease, and risk of dementia: an individual-participant meta-analysis. *BMJ.* 2019;365:i1495. <https://doi.org/10.1136/bmj.i1495> PMID: [30995986](https://pubmed.ncbi.nlm.nih.gov/30995986/)
38. Sterne JA, Hernán MA, Reeves BC, Savović J, Berkman ND, Viswanathan M, et al. ROBINS-I: a tool for assessing risk of bias in non-randomised studies of interventions. *BMJ.* 2016;355:i4919. <https://doi.org/10.1136/bmj.i4919> PMID: [27733354](https://pubmed.ncbi.nlm.nih.gov/27733354/)
39. Page MJ, McKenzie JE, Bossuyt PM, Boutron I, Hoffmann TC, Mulrow CD, et al. The PRISMA 2020 statement: an updated guideline for reporting systematic reviews. *BMJ.* 2021;372:n71. <https://doi.org/10.1136/bmj.n71> PMID: [33782057](https://pubmed.ncbi.nlm.nih.gov/33782057/)
40. Marcolino MAZ. Independent implementation of the ROBINS-I assessment tool. The Institute for Health Technology Assessment. 2020. [https://www.iats.com.br/uploads/ROBINS-I-ExcelTool-unoficial\\_macro.xlsm](https://www.iats.com.br/uploads/ROBINS-I-ExcelTool-unoficial_macro.xlsm)
41. Ross R, Chaput J-P, Giangregorio LM, Janssen I, Saunders TJ, Kho ME, et al. Canadian 24-Hour Movement Guidelines for Adults aged 18–64 years and Adults aged 65 years or older: an integration of physical activity, sedentary behaviour, and sleep. *Appl Physiol Nutr Metab.* 2020;45(10 (Suppl. 2)):S57–102. <https://doi.org/10.1139/apnm-2020-0467> PMID: [33054332](https://pubmed.ncbi.nlm.nih.gov/33054332/)
42. Higgins JPT, Thompson SG, Spiegelhalter DJ. A re-evaluation of random-effects meta-analysis. *J R Stat Soc Ser A Stat Soc.* 2009;172(1):137–59. <https://doi.org/10.1111/j.1467-985X.2008.00552.x> PMID: [19381330](https://pubmed.ncbi.nlm.nih.gov/19381330/)
43. R Core T. R: A language and environment for statistical computing. R Foundation for Statistical Computing. 2020.
44. Viechtbauer W. Conducting Meta-Analyses in R with the metafor Package. *J Stat Soft.* 2010;36(3). <https://doi.org/10.18637/jss.v036.i03>
45. Yoshitake T, Kiyohara Y, Kato I, Ohmura T, Iwamoto H, Nakayama K, et al. Incidence and risk factors of vascular dementia and Alzheimer's disease in a defined elderly Japanese population: the Hisayama Study. *Neurology.* 1995;45(6):1161–8. <https://doi.org/10.1212/wnl.45.6.1161> PMID: [7783883](https://pubmed.ncbi.nlm.nih.gov/7783883/)
46. Laurin D, Verreault R, Lindsay J, MacPherson K, Rockwood K. Physical activity and risk of cognitive impairment and dementia in elderly persons. *Arch Neurol.* 2001;58(3):498–504. <https://doi.org/10.1001/archneur.58.3.498> PMID: [11255456](https://pubmed.ncbi.nlm.nih.gov/11255456/)
47. Verghese J, Lipton RB, Katz MJ, Hall CB, Derby CA, Kuslansky G, et al. Leisure activities and the risk of dementia in the elderly. *N Engl J Med.* 2003;348(25):2508–16. <https://doi.org/10.1056/NEJMoa022252> PMID: [12815136](https://pubmed.ncbi.nlm.nih.gov/12815136/)
48. Abbott RD, White LR, Ross GW, Masaki KH, Curb JD, Petrovitch H. Walking and dementia in physically capable elderly men. *JAMA.* 2004;292(12):1447–53. <https://doi.org/10.1001/jama.292.12.1447> PMID: [15383515](https://pubmed.ncbi.nlm.nih.gov/15383515/)
49. Podewils LJ, Guallar E, Kuller LH, Fried LP, Lopez OL, Carlson M, et al. Physical activity, APOE genotype, and dementia risk: findings from the Cardiovascular Health Cognition Study. *Am J Epidemiol.* 2005;161(7):639–51. <https://doi.org/10.1093/aje/kwi092> PMID: [15781953](https://pubmed.ncbi.nlm.nih.gov/15781953/)
50. Ravaglia G, Forti P, Lucicesare A, Pisacane N, Rietti E, Bianchin M, et al. Physical activity and dementia risk in the elderly: findings from a prospective Italian study. *Neurology.* 2008;70(19 Pt 2):1786–94. <https://doi.org/10.1212/01.wnl.0000296276.50595.86> PMID: [18094335](https://pubmed.ncbi.nlm.nih.gov/18094335/)
51. Scarmeas N, Luchsinger JA, Schupf N, Brickman AM, Cosentino S, Tang MX, et al. Physical activity, diet, and risk of Alzheimer disease. *JAMA.* 2009;302(6):627–37. <https://doi.org/10.1001/jama.2009.1144> PMID: [19671904](https://pubmed.ncbi.nlm.nih.gov/19671904/)

52. Chang M, Jonsson PV, Snaedal J, Bjornsson S, Saczynski JS, Aspelund T, et al. The effect of midlife physical activity on cognitive function among older adults: AGES--Reykjavik Study. *J Gerontol A Biol Sci Med Sci*. 2010;65(12):1369–74. <https://doi.org/10.1093/gerona/gdq152> PMID: [20805238](https://pubmed.ncbi.nlm.nih.gov/20805238/)
53. Sattler C, Erickson KI, Toro P, Schröder J. Physical fitness as a protective factor for cognitive impairment in a prospective population-based study in Germany. *J Alzheimers Dis*. 2011;26(4):709–18. <https://doi.org/10.3233/JAD-2011-110548> PMID: [21694450](https://pubmed.ncbi.nlm.nih.gov/21694450/)
54. Bowen ME. A prospective examination of the relationship between physical activity and dementia risk in later life. *Am J Health Promot*. 2012;26(6):333–40. <https://doi.org/10.4278/ajhp.110311-QUAN-115> PMID: [22747314](https://pubmed.ncbi.nlm.nih.gov/22747314/)
55. Buchman AS, Boyle PA, Yu L, Shah RC, Wilson RS, Bennett DA. Total daily physical activity and the risk of AD and cognitive decline in older adults. *Neurology*. 2012;78(17):1323–9. <https://doi.org/10.1212/WNL.0b013e3182535d35> PMID: [22517108](https://pubmed.ncbi.nlm.nih.gov/22517108/)
56. Verdelho A, Madureira S, Ferro JM, Baezner H, Blahak C, Poggesi A, et al. Physical activity prevents progression for cognitive impairment and vascular dementia: results from the LADIS (Leukoaraiosis and Disability) study. *Stroke*. 2012;43(12):3331–5. <https://doi.org/10.1161/STROKEAHA.112.661793> PMID: [23117721](https://pubmed.ncbi.nlm.nih.gov/23117721/)
57. Luck T, Riedel-Heller SG, Luppia M, Wiese B, Köhler M, Jessen F, et al. Apolipoprotein E epsilon 4 genotype and a physically active lifestyle in late life: analysis of gene-environment interaction for the risk of dementia and Alzheimer's disease dementia. *Psychol Med*. 2014;44(6):1319–29. <https://doi.org/10.1017/S0033291713001918> PMID: [23883793](https://pubmed.ncbi.nlm.nih.gov/23883793/)
58. de Bruijn RFAG, Schrijvers EMC, de Groot KA, Witteman JCM, Hofman A, Franco OH, et al. The association between physical activity and dementia in an elderly population: the Rotterdam Study. *Eur J Epidemiol*. 2013;28(3):277–83. <https://doi.org/10.1007/s10654-013-9773-3> PMID: [23385659](https://pubmed.ncbi.nlm.nih.gov/23385659/)
59. Elwood P, Galante J, Pickering J, Palmer S, Bayer A, Ben-Shlomo Y, et al. Healthy lifestyles reduce the incidence of chronic diseases and dementia: evidence from the Caerphilly cohort study. *PLoS One*. 2013;8(12):e81877. <https://doi.org/10.1371/journal.pone.0081877> PMID: [24349147](https://pubmed.ncbi.nlm.nih.gov/24349147/)
60. Gray SL, Anderson ML, Hubbard RA, LaCroix A, Crane PK, McCormick W, et al. Frailty and incident dementia. *J Gerontol A Biol Sci Med Sci*. 2013;68(9):1083–90. <https://doi.org/10.1093/gerona/glt013> PMID: [23419778](https://pubmed.ncbi.nlm.nih.gov/23419778/)
61. Tolppanen A-M, Solomon A, Kulmala J, Kåreholt I, Ngandu T, Rusanen M, et al. Leisure-time physical activity from mid- to late life, body mass index, and risk of dementia. *Alzheimers Dement*. 2015;11(4):434–443.e6. <https://doi.org/10.1016/j.jalz.2014.01.008> PMID: [24721528](https://pubmed.ncbi.nlm.nih.gov/24721528/)
62. Wang S, Luo X, Barnes D, Sano M, Yaffe K. Physical activity and risk of cognitive impairment among oldest-old women. *Am J Geriatr Psychiatry*. 2014;22(11):1149–57. <https://doi.org/10.1016/j.jagp.2013.03.002> PMID: [23831179](https://pubmed.ncbi.nlm.nih.gov/23831179/)
63. Llamas-Velasco S, Contador I, Villarejo-Galende A, Lora-Pablos D, Bermejo-Pareja F. Physical Activity as Protective Factor against Dementia: A Prospective Population-Based Study (NEDICES). *J Int Neuropsychol Soc*. 2015;21(10):861–7. <https://doi.org/10.1017/S1355617715000831> PMID: [26581797](https://pubmed.ncbi.nlm.nih.gov/26581797/)
64. Neergaard JS, Dragsbæk K, Hansen HB, Henriksen K, Christiansen C, Karsdal MA. Late-Life Risk Factors for All-Cause Dementia and Differential Dementia Diagnoses in Women: A Prospective Cohort Study. *Medicine (Baltimore)*. 2016;95(11):e3112. <https://doi.org/10.1097/MD.00000000000003112> PMID: [26986157](https://pubmed.ncbi.nlm.nih.gov/26986157/)
65. Paganini-Hill A, Kawas CH, Corrada MM. Lifestyle Factors and Dementia in the Oldest-old: The 90+ Study. *Alzheimer Dis Assoc Disord*. 2016;30(1):21–6. <https://doi.org/10.1097/WAD.0000000000000087> PMID: [25710250](https://pubmed.ncbi.nlm.nih.gov/25710250/)
66. Hessler JB, Ander K-H, Brönnner M, Etgen T, Förstl H, Poppert H, et al. Predicting dementia in primary care patients with a cardiovascular health metric: a prospective population-based study. *BMC Neurol*. 2016;16:116. <https://doi.org/10.1186/s12883-016-0646-8> PMID: [27459854](https://pubmed.ncbi.nlm.nih.gov/27459854/)
67. Müller J, Chan K, Myers JN. Association Between Exercise Capacity and Late Onset of Dementia, Alzheimer Disease, and Cognitive Impairment. *Mayo Clin Proc*. 2017;92(2):211–7. <https://doi.org/10.1016/j.mayocp.2016.10.020> PMID: [28082018](https://pubmed.ncbi.nlm.nih.gov/28082018/)
68. Tan ZS, Spartano NL, Beiser AS, et al. Physical Activity, Brain Volume, and Dementia Risk: The Framingham Study. *J Gerontol A Biol Sci Med Sci*. 2017;72(6):789–95. <https://doi.org/10.1093/gerona/glw130>
69. Gross AL, Lu H, Meoni L, Gallo JJ, Schrack JA, Sharrett AR. Physical Activity in Midlife is not Associated with Cognitive Health in Later Life Among Cognitively Normal Older Adults. *J Alzheimers Dis*. 2017;59(4):1349–58. <https://doi.org/10.3233/JAD-170290> PMID: [28759969](https://pubmed.ncbi.nlm.nih.gov/28759969/)
70. Tomata Y, Zhang S, Sugiyama K, Kaiho Y, Sugawara Y, Tsuji I. Age Ageing. 2017;46(5):857–60. <https://doi.org/10.1093/ageing/afx078>
71. Sabia S, Dugravot A, Dartigues J-F, Abell J, Elbaz A, Kivimäki M, et al. Physical activity, cognitive decline, and risk of dementia: 28 year follow-up of Whitehall II cohort study. *BMJ*. 2017;357:j2709. <https://doi.org/10.1136/bmj.j2709> PMID: [28642251](https://pubmed.ncbi.nlm.nih.gov/28642251/)
72. Deckers K, Köhler S, van Boxtel M, Verhey F, Brayne C, Fleming J. Lack of associations between modifiable risk factors and dementia in the very old: findings from the Cambridge City over-75s cohort study. *Aging Ment Health*. 2018;22(10):1272–8. <https://doi.org/10.1080/13607863.2017.1280767> PMID: [28151002](https://pubmed.ncbi.nlm.nih.gov/28151002/)
73. Hwangbo S, Lee JY, Han G, Chun MY, Jang H, Seo SW, et al. Dementia incidence and population-attributable fraction for dementia risk factors in Republic of Korea: a 12-year longitudinal follow-up study of a national cohort. *Front Aging Neurosci*. 2023;15:1126587. <https://doi.org/10.3389/fnagi.2023.1126587> PMID: [37520131](https://pubmed.ncbi.nlm.nih.gov/37520131/)
74. Shakersain B, Rizzuto D, Wang H-X, Faxén-Irving G, Prinelli F, Fratiglioni L, et al. An Active Lifestyle Reinforces the Effect of a Healthy Diet on Cognitive Function: A Population-Based Longitudinal Study. *Nutrients*. 2018;10(9):1297. <https://doi.org/10.3390/nu10091297> PMID: [30217035](https://pubmed.ncbi.nlm.nih.gov/30217035/)
75. Shih I-F, Paul K, Haan M, Yu Y, Ritz B. Physical activity modifies the influence of apolipoprotein E ε4 allele and type 2 diabetes on dementia and cognitive impairment among older Mexican Americans. *Alzheimers Dement*. 2018;14(1):1–9. <https://doi.org/10.1016/j.jalz.2017.05.005> PMID: [28692819](https://pubmed.ncbi.nlm.nih.gov/28692819/)

76. Larsson SC, Wolk A. The Role of Lifestyle Factors and Sleep Duration for Late-Onset Dementia: A Cohort Study. *J Alzheimers Dis*. 2018;66(2):579–86. <https://doi.org/10.3233/JAD-180529> PMID: [30320581](https://pubmed.ncbi.nlm.nih.gov/30320581/)
77. Shaaban CE, Jia Y, Chang C-CH, Ganguli M. Independent and joint effects of vascular and cardiometabolic risk factor pairs for risk of all-cause dementia: a prospective population-based study. *Int Psychogeriatr*. 2019;31(10):1421–32. <https://doi.org/10.1017/S1041610219001066> PMID: [31455442](https://pubmed.ncbi.nlm.nih.gov/31455442/)
78. Hansson O, Svensson M, Gustavsson A-M, Andersson E, Yang Y, Nägga K, et al. Midlife physical activity is associated with lower incidence of vascular dementia but not Alzheimer's disease. *Alzheimers Res Ther*. 2019;11(1):87. <https://doi.org/10.1186/s13195-019-0538-4> PMID: [31630687](https://pubmed.ncbi.nlm.nih.gov/31630687/)
79. Najjar J, Östling S, Gudmundsson P, Sundh V, Johansson L, Kern S, et al. Cognitive and physical activity and dementia: A 44-year longitudinal population study of women. *Neurology*. 2019;92(12):e1322–30. <https://doi.org/10.1212/WNL.0000000000007021> PMID: [30787164](https://pubmed.ncbi.nlm.nih.gov/30787164/)
80. Palta P, Sharrett AR, Deal JA, Evenson KR, Gabriel KP, Folsom AR, et al. Leisure-time physical activity sustained since midlife and preservation of cognitive function: The Atherosclerosis Risk in Communities Study. *Alzheimers Dement*. 2019;15(2):273–81. <https://doi.org/10.1016/j.jalz.2018.08.008> PMID: [30321503](https://pubmed.ncbi.nlm.nih.gov/30321503/)
81. Zotcheva E, Bergh S, Selbæk G, Krokstad S, Håberg AK, Strand BH, et al. Midlife Physical Activity, Psychological Distress, and Dementia Risk: The HUNT Study. *J Alzheimers Dis*. 2018;66(2):825–33. <https://doi.org/10.3233/JAD-180768> PMID: [30320592](https://pubmed.ncbi.nlm.nih.gov/30320592/)
82. Kunutsor SK, Laukkanen JA, Kauhanen J, Willeit P. Physical activity may not be associated with long-term risk of dementia and Alzheimer's disease. *Eur J Clin Invest*. 2021;51(3):e13415. <https://doi.org/10.1111/eci.13415> PMID: [32991743](https://pubmed.ncbi.nlm.nih.gov/32991743/)
83. Rolandi E, Zaccaria D, Vaccaro R, Abbondanza S, Pettinato L, Davin A, et al. Estimating the potential for dementia prevention through modifiable risk factors elimination in the real-world setting: a population-based study. *Alzheimers Res Ther*. 2020;12(1):94. <https://doi.org/10.1186/s13195-020-00661-y> PMID: [32767997](https://pubmed.ncbi.nlm.nih.gov/32767997/)
84. Dupré C, Bongue B, Helmer C, Dartigues JF, Hupin D, Roche F, et al. Physical activity types and risk of dementia in community-dwelling older people: the Three-City cohort. *BMC Geriatr*. 2020;20(1):132. <https://doi.org/10.1186/s12877-020-01538-3> PMID: [32276604](https://pubmed.ncbi.nlm.nih.gov/32276604/)
85. Wu W, Ding D, Zhao Q, Wang R, Liang X, Xiao Z, et al. Medium-to-High Late-Life Physical Activity Is Associated with Lower Risk of Incident Dementia: The Shanghai Aging Study. *J Alzheimers Dis*. 2020;73(2):751–8. <https://doi.org/10.3233/JAD-190937> PMID: [31839611](https://pubmed.ncbi.nlm.nih.gov/31839611/)
86. Boongird P, Chamnan P, Laptikultham S, et al. Dose-response relationship between physical exercise and risk of physician-diagnosed dementia in 206 073 Thai community-dwelling men and women: HCUR study. *Eur J Neurol*. 2020;27(10):1879–86. <https://doi.org/10.1111/ene.14354>
87. Floud S, Simpson RF, Balkwill A, Brown A, Goodill A, Gallacher J, et al. Body mass index, diet, physical inactivity, and the incidence of dementia in 1 million UK women. *Neurology*. 2020;94(2):e123–32. <https://doi.org/10.1212/WNL.0000000000008779> PMID: [31852815](https://pubmed.ncbi.nlm.nih.gov/31852815/)
88. Feter N, Mielke GI, Leite JS, Brown WJ, Coombes JS, Rombaldi AJ. Physical activity in later life and risk of dementia: Findings from a population-based cohort study. *Exp Gerontol*. 2021;143:111145. <https://doi.org/10.1016/j.exger.2020.111145> PMID: [33189834](https://pubmed.ncbi.nlm.nih.gov/33189834/)
89. Yoon M, Yang P-S, Jin M-N, Yu HT, Kim T-H, Jang E, et al. Association of Physical Activity Level With Risk of Dementia in a Nationwide Cohort in Korea. *JAMA Netw Open*. 2021;4(12):e2138526. <https://doi.org/10.1001/jamanetworkopen.2021.38526> PMID: [34913979](https://pubmed.ncbi.nlm.nih.gov/34913979/)
90. Nabe-Nielsen K, Holtermann A, Gyntelberg F, Garde AH, Islamoska S, Prescott E, et al. The effect of occupational physical activity on dementia: Results from the Copenhagen Male Study. *Scand J Med Sci Sports*. 2021;31(2):446–55. <https://doi.org/10.1111/sms.13846> PMID: [33038033](https://pubmed.ncbi.nlm.nih.gov/33038033/)
91. Stephan Y, Sutin AR, Luchetti M, Aschwanden D, Terracciano A. Self-rated health and incident dementia over two decades: Replication across two cohorts. *J Psychiatr Res*. 2021;143:462–6. <https://doi.org/10.1016/j.jpsychires.2021.06.036> PMID: [34311955](https://pubmed.ncbi.nlm.nih.gov/34311955/)
92. Yang JJ, Keohane LM, Pan X-F, Qu R, Shu X-O, Lipworth L, et al. Association of Healthy Lifestyles With Risk of Alzheimer Disease and Related Dementias in Low-Income Black and White Americans. *Neurology*. 2022;99(9):e944–53. <https://doi.org/10.1212/WNL.0000000000200774> PMID: [35697505](https://pubmed.ncbi.nlm.nih.gov/35697505/)
93. Huang S-Y, Li Y-Z, Zhang Y-R, Huang Y-Y, Wu B-S, Zhang W, et al. Sleep, physical activity, sedentary behavior, and risk of incident dementia: a prospective cohort study of 431,924 UK Biobank participants. *Mol Psychiatry*. 2022;27(10):4343–54. <https://doi.org/10.1038/s41380-022-01655-y> PMID: [35701596](https://pubmed.ncbi.nlm.nih.gov/35701596/)
94. Benito-León J, Bermejo-Pareja F, Vega S, Louis ED. Total daily sleep duration and the risk of dementia: a prospective population-based study. *Eur J Neurol*. 2009;16(9):990–7. <https://doi.org/10.1111/j.1468-1331.2009.02618.x> PMID: [19473367](https://pubmed.ncbi.nlm.nih.gov/19473367/)
95. Virta JJ, Heikilä K, Perola M, Koskenvuo M, Rähä I, Rinne JO, et al. Midlife sleep characteristics associated with late life cognitive function. *Sleep*. 2013;36(10):1533–41, 1541A. <https://doi.org/10.5665/sleep.3052> PMID: [24082313](https://pubmed.ncbi.nlm.nih.gov/24082313/)
96. Chen J-C, Espeland MA, Brunner RL, Lovato LC, Wallace RB, Leng X, et al. Sleep duration, cognitive decline, and dementia risk in older women. *Alzheimers Dement*. 2016;12(1):21–33. <https://doi.org/10.1016/j.jalz.2015.03.004> PMID: [26086180](https://pubmed.ncbi.nlm.nih.gov/26086180/)
97. Diem SJ, Blackwell TL, Stone KL, Yaffe K, Tranah G, Cauley JA, et al. Measures of Sleep-Wake Patterns and Risk of Mild Cognitive Impairment or Dementia in Older Women. *Am J Geriatr Psychiatry*. 2016;24(3):248–58. <https://doi.org/10.1016/j.jagp.2015.12.002> PMID: [26964485](https://pubmed.ncbi.nlm.nih.gov/26964485/)
98. Bokenberger K, Ström P, Dahl Aslan AK, Johansson ALV, Gatz M, Pedersen NL, et al. Association Between Sleep Characteristics and Incident Dementia Accounting for Baseline Cognitive Status: A Prospective Population-Based Study. *J Gerontol A Biol Sci Med Sci*. 2017;72(1):134–9. <https://doi.org/10.1093/gerona/glw127> PMID: [27402049](https://pubmed.ncbi.nlm.nih.gov/27402049/)
99. Sabia S, Fayosse A, Dumurgier J, van Hees VT, Paquet C, Sommerlad A, et al. Association of sleep duration in middle and old age with incidence of dementia. *Nat Commun*. 2021;12(1):2289. <https://doi.org/10.1038/s41467-021-22354-2> PMID: [33879784](https://pubmed.ncbi.nlm.nih.gov/33879784/)

100. Luojuus MK, Lehto SM, Tolmunen T, Brem A-K, Lönnroos E, Kauhanen J. Self-reported sleep disturbance and incidence of dementia in ageing men. *J Epidemiol Community Health*. 2017;71(4):329–35. <https://doi.org/10.1136/jech-2016-207764> PMID: [28275046](https://pubmed.ncbi.nlm.nih.gov/28275046/)
101. Westwood AJ, Beiser A, Jain N, Himali JJ, DeCarli C, Auerbach SH, et al. Prolonged sleep duration as a marker of early neurodegeneration predicting incident dementia. *Neurology*. 2017;88(12):1172–9. <https://doi.org/10.1212/WNL.0000000000003732> PMID: [28228567](https://pubmed.ncbi.nlm.nih.gov/28228567/)
102. Lutsey PL, Misialek JR, Mosley TH, Gottesman RF, Punjabi NM, Shahar E, et al. Sleep characteristics and risk of dementia and Alzheimer's disease: The Atherosclerosis Risk in Communities Study. *Alzheimers Dement*. 2018;14(2):157–66. <https://doi.org/10.1016/j.jalz.2017.06.2269> PMID: [28738188](https://pubmed.ncbi.nlm.nih.gov/28738188/)
103. Sindi S, Kåreholt I, Johansson L, Skoog J, Sjöberg L, Wang H-X, et al. Sleep disturbances and dementia risk: A multicenter study. *Alzheimers Dement*. 2018;14(10):1235–42. <https://doi.org/10.1016/j.jalz.2018.05.012> PMID: [30030112](https://pubmed.ncbi.nlm.nih.gov/30030112/)
104. Ohara T, Honda T, Hata J, Yoshida D, Mukai N, Hirakawa Y, et al. Association Between Daily Sleep Duration and Risk of Dementia and Mortality in a Japanese Community. *J Am Geriatr Soc*. 2018;66(10):1911–8. <https://doi.org/10.1111/jgs.15446> PMID: [29873398](https://pubmed.ncbi.nlm.nih.gov/29873398/)
105. Lu Y, Sugawara Y, Zhang S, Tomata Y, Tsuji I. Changes in sleep duration and the risk of incident dementia in the elderly Japanese: the Ohsaki Cohort 2006 Study. *Sleep*. 2018;41(10):zsy143. <https://doi.org/10.1093/sleep/zsy143> PMID: [30053239](https://pubmed.ncbi.nlm.nih.gov/30053239/)
106. Ukawa S, Zhao W, Okabayashi S, Kimura T, Ando M, Wakai K, et al. Association between daily sleep duration and the risk of incident dementia according to the presence or absence of diseases among older Japanese individuals in the New Integrated Suburban Seniority Investigation (NISSIN) project. *Sleep Med*. 2022;100:190–5. <https://doi.org/10.1016/j.sleep.2022.08.022> PMID: [36113230](https://pubmed.ncbi.nlm.nih.gov/36113230/)
107. Liu R, Ren Y, Hou T, Liang X, Dong Y, Wang Y, et al. Associations of sleep timing and time in bed with dementia and cognitive decline among Chinese older adults: A cohort study. *J Am Geriatr Soc*. 2022;70(11):3138–51. <https://doi.org/10.1111/jgs.18042> PMID: [36128778](https://pubmed.ncbi.nlm.nih.gov/36128778/)
108. Wong ATY, Reeves GK, Floud S. Total sleep duration and daytime napping in relation to dementia detection risk: Results from the Million Women Study. *Alzheimers Dement*. 2023;19(11):4978–86. <https://doi.org/10.1002/alz.13009> PMID: [37083147](https://pubmed.ncbi.nlm.nih.gov/37083147/)
109. Huang X, Tan CS, Kandiah N, Hilal S. Association of physical activity with dementia and cognitive decline in UK Biobank. *Alzheimers Dement (Amst)*. 2023;15(3):e12476. <https://doi.org/10.1002/dad2.12476> PMID: [37671035](https://pubmed.ncbi.nlm.nih.gov/37671035/)
110. Du Z, Sato K, Tsuji T, Kondo K, Kondo N. Sedentary behavior and the combination of physical activity associated with dementia, functional disability, and mortality: A cohort study of 90,471 older adults in Japan. *Prev Med*. 2024;180:107879. <https://doi.org/10.1016/j.ypmed.2024.107879> PMID: [38272270](https://pubmed.ncbi.nlm.nih.gov/38272270/)
111. Hamer M, Chida Y. Physical activity and risk of neurodegenerative disease: a systematic review of prospective evidence. *Psychol Med*. 2009;39(1):3–11. <https://doi.org/10.1017/S0033291708003681> PMID: [18570697](https://pubmed.ncbi.nlm.nih.gov/18570697/)
112. Rovio S, Kåreholt I, Helkala E-L, Viitanen M, Winblad B, Tuomilehto J, et al. Leisure-time physical activity at midlife and the risk of dementia and Alzheimer's disease. *Lancet Neurol*. 2005;4(11):705–11. [https://doi.org/10.1016/S1474-4422\(05\)70198-8](https://doi.org/10.1016/S1474-4422(05)70198-8) PMID: [16239176](https://pubmed.ncbi.nlm.nih.gov/16239176/)
113. Andel R, Crowe M, Pedersen NL, Fratiglioni L, Johansson B, Gatz M. Physical exercise at midlife and risk of dementia three decades later: a population-based study of Swedish twins. *J Gerontol A Biol Sci Med Sci*. 2008;63(1):62–6. <https://doi.org/10.1093/gerona/63.1.62> PMID: [18245762](https://pubmed.ncbi.nlm.nih.gov/18245762/)
114. Iso-Markku P, Waller K, Kujala UM, Kaprio J. Physical activity and dementia: long-term follow-up study of adult twins. *Ann Med*. 2015;47(2):81–7. <https://doi.org/10.3109/07853890.2014.994675> PMID: [25613168](https://pubmed.ncbi.nlm.nih.gov/25613168/)
115. Fan L, Xu W, Cai Y, Hu Y, Wu C. Sleep Duration and the Risk of Dementia: A Systematic Review and Meta-analysis of Prospective Cohort Studies. *J Am Med Dir Assoc*. 2019;20(12):1480–1487.e5. <https://doi.org/10.1016/j.jamda.2019.06.009> PMID: [31604673](https://pubmed.ncbi.nlm.nih.gov/31604673/)
116. Xu W, Tan C-C, Zou J-J, Cao X-P, Tan L. Sleep problems and risk of all-cause cognitive decline or dementia: an updated systematic review and meta-analysis. *J Neurol Neurosurg Psychiatry*. 2020;91(3):236–44. <https://doi.org/10.1136/jnnp-2019-321896> PMID: [31879285](https://pubmed.ncbi.nlm.nih.gov/31879285/)
117. Liang Y, Qu L-B, Liu H. Non-linear associations between sleep duration and the risks of mild cognitive impairment/dementia and cognitive decline: a dose-response meta-analysis of observational studies. *Aging Clin Exp Res*. 2019;31(3):309–20. <https://doi.org/10.1007/s40520-018-1005-y> PMID: [30039452](https://pubmed.ncbi.nlm.nih.gov/30039452/)
118. Henry A, Katsoulis M, Masi S, Fatemifar G, Denaxas S, Acosta D, et al. The relationship between sleep duration, cognition and dementia: a Mendelian randomization study. *Int J Epidemiol*. 2019;48(3):849–60. <https://doi.org/10.1093/ije/dyz071> PMID: [31062029](https://pubmed.ncbi.nlm.nih.gov/31062029/)
119. Wong R, Lovier MA. Sleep Disturbances and Dementia Risk in Older Adults: Findings From 10 Years of National U.S. Prospective Data. *Am J Prev Med*. 2023;64(6):781–7. <https://doi.org/10.1016/j.amepre.2023.01.008> PMID: [36707315](https://pubmed.ncbi.nlm.nih.gov/36707315/)
120. Balboa-Castillo T, León-Muñoz LM, Graciani A, Rodríguez-Artalejo F, Guallar-Castillón P. Longitudinal association of physical activity and sedentary behavior during leisure time with health-related quality of life in community-dwelling older adults. *Health Qual Life Outcomes*. 2011;9:47. <https://doi.org/10.1186/1477-7525-9-47> PMID: [21708011](https://pubmed.ncbi.nlm.nih.gov/21708011/)
121. Kivipelto M, Rovio S, Ngandu T, Kåreholt I, Eskelinen M, Winblad B, et al. Apolipoprotein E epsilon4 magnifies lifestyle risks for dementia: a population-based study. *J Cell Mol Med*. 2008;12(6B):2762–71. <https://doi.org/10.1111/j.1582-4934.2008.00296.x> PMID: [18318693](https://pubmed.ncbi.nlm.nih.gov/18318693/)
122. Rosanti S, da Silva GE, Santos FH. Longitudinal effects of physical activity on self-efficacy and cognitive processing of active and sedentary elderly women. *Dement Neuropsychol*. 2014;8(2):187–93. <https://doi.org/10.1590/S1980-57642014DN8200016> PMID: [29213902](https://pubmed.ncbi.nlm.nih.gov/29213902/)
123. Maasackers CM, Claassen JAHR, Gardiner PA, Olde Rikkert MGM, Lipnicki DM, Scarmeas N, et al. The Association of Sedentary Behaviour and Cognitive Function in People Without Dementia: A Coordinated Analysis Across Five Cohort Studies from COSMIC. *Sports Med*. 2020;50(2):403–13. <https://doi.org/10.1007/s40279-019-01186-7> PMID: [31529300](https://pubmed.ncbi.nlm.nih.gov/31529300/)

124. Dillon K, Gardiner PA. Association between sedentary behaviour and risk of dementia: an evidence gap. *Transl Psychiatry*. 2021;11(1):195. <https://doi.org/10.1038/s41398-021-01316-8> PMID: [33785728](https://pubmed.ncbi.nlm.nih.gov/33785728/)
125. Tremblay MS, Aubert S, Barnes JD, Saunders TJ, Carson V, Latimer-Cheung AE, et al. Sedentary Behavior Research Network (SBRN) - Terminology Consensus Project process and outcome. *Int J Behav Nutr Phys Act*. 2017;14(1):75. <https://doi.org/10.1186/s12966-017-0525-8> PMID: [28599680](https://pubmed.ncbi.nlm.nih.gov/28599680/)
126. Falck RS, Davis JC, Liu-Ambrose T. What is the association between sedentary behaviour and cognitive function? A systematic review. *Br J Sports Med*. 2017;51(10):800–11. <https://doi.org/10.1136/bjsports-2015-095551> PMID: [27153869](https://pubmed.ncbi.nlm.nih.gov/27153869/)
127. Wheeler MJ, Dempsey PC, Grace MS, Ellis KA, Gardiner PA, Green DJ, et al. Sedentary behavior as a risk factor for cognitive decline? A focus on the influence of glycemic control in brain health. *Alzheimers Dement (N Y)*. 2017;3(3):291–300. <https://doi.org/10.1016/j.trci.2017.04.001> PMID: [29067335](https://pubmed.ncbi.nlm.nih.gov/29067335/)
128. Bherer L, Erickson KI, Liu-Ambrose T. A review of the effects of physical activity and exercise on cognitive and brain functions in older adults. *J Aging Res*. 2013;2013:657508. <https://doi.org/10.1155/2013/657508> PMID: [24102028](https://pubmed.ncbi.nlm.nih.gov/24102028/)
129. Barnes DE, Covinsky KE, Whitmer RA, Kuller LH, Lopez OL, Yaffe K. Commentary on “Developing a national strategy to prevent dementia: Leon Thal Symposium 2009.” Dementia risk indices: A framework for identifying individuals with a high dementia risk. *Alzheimers Dement*. 2010;6(2):138–41. <https://doi.org/10.1016/j.jalz.2010.01.005>
130. Barcelos-Ferreira R, Nakano EY, Steffens DC, Bottino CMC. Quality of life and physical activity associated to lower prevalence of depression in community-dwelling elderly subjects from Sao Paulo. *J Affect Disord*. 2013;150(2):616–22. <https://doi.org/10.1016/j.jad.2013.02.024> PMID: [23499164](https://pubmed.ncbi.nlm.nih.gov/23499164/)
131. Smith JC, Nielson KA, Woodard JL, Seidenberg M, Durgerian S, Hazlett KE, et al. Physical activity reduces hippocampal atrophy in elders at genetic risk for Alzheimer’s disease. *Front Aging Neurosci*. 2014;6:61. <https://doi.org/10.3389/fnagi.2014.00061> PMID: [24795624](https://pubmed.ncbi.nlm.nih.gov/24795624/)
132. Lindsay J, Laurin D, Verreault R, Hébert R, Helliwell B, Hill GB, et al. Risk factors for Alzheimer’s disease: a prospective analysis from the Canadian Study of Health and Aging. *Am J Epidemiol*. 2002;156(5):445–53. <https://doi.org/10.1093/aje/kwf074> PMID: [12196314](https://pubmed.ncbi.nlm.nih.gov/12196314/)
133. Larson EB, Wang L, Bowen JD, McCormick WC, Teri L, Crane P, et al. Exercise is associated with reduced risk for incident dementia among persons 65 years of age and older. *Ann Intern Med*. 2006;144(2):73–81. <https://doi.org/10.7326/0003-4819-144-2-200601170-00004> PMID: [16418406](https://pubmed.ncbi.nlm.nih.gov/16418406/)
134. Jessen NA, Munk ASF, Lundgaard I, Nedergaard M. The Glymphatic System: A Beginner’s Guide. *Neurochem Res*. 2015;40(12):2583–99. <https://doi.org/10.1007/s11064-015-1581-6> PMID: [25947369](https://pubmed.ncbi.nlm.nih.gov/25947369/)
135. Musiek ES, Xiong DD, Holtzman DM. Sleep, circadian rhythms, and the pathogenesis of Alzheimer disease. *Exp Mol Med*. 2015;47(3):e148. <https://doi.org/10.1038/emm.2014.121> PMID: [25766617](https://pubmed.ncbi.nlm.nih.gov/25766617/)
136. Ju Y-ES, McLeland JS, Toedebusch CD, Xiong C, Fagan AM, Duntley SP, et al. Sleep quality and preclinical Alzheimer disease. *JAMA Neurol*. 2013;70(5):587–93. <https://doi.org/10.1001/jamaneurol.2013.2334> PMID: [23479184](https://pubmed.ncbi.nlm.nih.gov/23479184/)
137. Lee DH, Rezende LFM, Ferrari G, Aune D, Keum N, Tabung FK, et al. Physical activity and all-cause and cause-specific mortality: assessing the impact of reverse causation and measurement error in two large prospective cohorts. *Eur J Epidemiol*. 2021;36(3):275–85. <https://doi.org/10.1007/s10654-020-00707-3> PMID: [33428024](https://pubmed.ncbi.nlm.nih.gov/33428024/)
138. Morgan GS, Gallacher J, Bayer A, Fish M, Ebrahim S, Ben-Shlomo Y. Physical activity in middle-age and dementia in later life: findings from a prospective cohort of men in Caerphilly, South Wales and a meta-analysis. *J Alzheimers Dis*. 2012;31(3):569–80. <https://doi.org/10.3233/JAD-2012-112171> PMID: [22647258](https://pubmed.ncbi.nlm.nih.gov/22647258/)
139. Santos-Lozano A, Pareja-Galeano H, Sanchis-Gomar F, Quindós-Rubial M, Fiuza-Luces C, Cristi-Montero C, et al. Physical Activity and Alzheimer Disease: A Protective Association. *Mayo Clin Proc*. 2016;91(8):999–1020. <https://doi.org/10.1016/j.mayocp.2016.04.024> PMID: [27492909](https://pubmed.ncbi.nlm.nih.gov/27492909/)
